# Supplementary material
Source: PubMed Central journal article supplement (PMC7269367)

## SUPPORTING INFORMATION

### Metabolism of Benzalkonium Chlorides by Human Hepatic Cytochromes P450

Ryan P. Seguin,<sup>1</sup> Josi M. Herron,<sup>2</sup> Vanessa Lopez,<sup>1</sup> Joseph L. Dempsey,<sup>2</sup> Libin Xu<sup>\*1,2</sup>

<sup>1</sup>Department of Medicinal Chemistry, School of Pharmacy, University of Washington, Seattle, Washington 98195

<sup>2</sup>Department of Environmental and Occupational Health Sciences, School of Public Health, University of Washington, Seattle, Washington 98195

\*Corresponding Author: Libin Xu, Ph.D.; Department of Medicinal Chemistry, School of Pharmacy, University of Washington, Seattle, WA 98195; E-mail: libinxu@uw.edu; Phone: (206) 543-1080

#### Table of Contents:

|                   |                                                                                                    |
|-------------------|----------------------------------------------------------------------------------------------------|
| <b>Page S-3:</b>  | <b>Figure S1.</b> MS/MS fragmentation of parent BAC compounds.                                     |
| <b>Page S-4:</b>  | <b>Figure S2.</b> MS/MS fragmentation of major +1O BAC microsomal metabolites.                     |
| <b>Page S-5:</b>  | <b>Figure S3.</b> MS/MS fragmentation of minor +1O BAC microsomal metabolites.                     |
| <b>Page S-6:</b>  | <b>Figure S4.</b> MS/MS fragmentation of major +2O BAC microsomal metabolites.                     |
| <b>Page S-7:</b>  | <b>Figure S5.</b> MS/MS fragmentation of major +1O, -2H BAC microsomal metabolites.                |
| <b>Page S-8:</b>  | <b>Figure S6.</b> MS/MS fragmentation of major +1O, -2H BAC microsomal metabolites.                |
| <b>Page S-9:</b>  | <b>Figure S7.</b> MS/MS fragmentation of authentic C <sub>10</sub> -BAC metabolite standards.      |
| <b>Page S-10:</b> | <b>Figure S8.</b> LC-MS chromatograms of authentic C <sub>10</sub> -BAC metabolite standards.      |
| <b>Page S-11:</b> | <b>Figure S9.</b> LC-MS chromatograms of +1O BAC microsomal metabolites.                           |
| <b>Page S-12:</b> | <b>Figure S10.</b> LC-MS chromatograms of +2O BAC microsomal metabolites.                          |
| <b>Page S-13:</b> | <b>Figure S11.</b> LC-MS chromatograms of +1O, -2H BAC microsomal metabolites.                     |
| <b>Page S-14:</b> | <b>Figure S12.</b> LC-MS chromatograms of +2O, -2H BAC microsomal metabolites.                     |
| <b>Page S-15:</b> | <b>Figure S13.</b> LC-MS chromatograms of C <sub>10</sub> -BAC metabolites in recombinant CYP2D6.  |
| <b>Page S-16:</b> | <b>Figure S14.</b> LC-MS chromatograms of C <sub>10</sub> -BAC metabolites in recombinant CYP4F12. |
| <b>Page S-17:</b> | <b>Figure S15.</b> LC-MS chromatograms of C <sub>16</sub> -BAC metabolites in recombinant CYP2D6.  |
| <b>Page S-18:</b> | <b>Figure S16.</b> LC-MS chromatograms of C <sub>16</sub> -BAC metabolites in recombinant CYP4F12. |
| <b>Page S-19:</b> | <b>Figure S17.</b> LC-MS chromatograms of C <sub>16</sub> -BAC metabolites in recombinant CYP4F2.  |
| <b>Page S-20:</b> | <b>Figure S18.</b> <sup>1</sup> H-NMR of ω-hydroxy C <sub>10</sub> -BAC in CDCl <sub>3</sub> .     |

- Page S-21:** **Figure S19.**  $^1\text{H-NMR}$  of  $\omega$ -alkene  $\text{C}_{10}$ -BAC in  $\text{CDCl}_3$ .
- Page S-22:** **Figure S20.**  $^1\text{H-NMR}$  of ( $\omega$ -1)-hydroxy  $\text{C}_{10}$ -BAC in  $\text{CDCl}_3$ .
- Page S-23:** **Figure S21.**  $^1\text{H-NMR}$  of ( $\omega$ ,  $\omega$ -1)-dihydroxy  $\text{C}_{10}$ -BAC in  $\text{CDCl}_3$ .
- Page S-24:** **Figure S22.**  $^1\text{H-NMR}$  of ( $\omega$ -1)-ketone  $\text{C}_{10}$ -BAC in  $\text{CDCl}_3$ .
- Page S-25:** **Figure S23.**  $^1\text{H-NMR}$  of  $\omega$ -carboxylic acid  $\text{C}_{10}$ -BAC in  $\text{CDCl}_3$ .
- Page S-26:** **Figure S24.**  $^1\text{H-NMR}$  of  $\omega$ -carboxylic acid  $\text{C}_{10}$ -BAC in  $\text{d}_6$ -DMSO.

**Figure S1.** Representative MS/MS fragmentation spectra (25 eV collision energy) of (A) C<sub>10</sub>-BAC, (B) C<sub>12</sub>-BAC, (C) C<sub>14</sub>-BAC, and (D) C<sub>16</sub>-BAC are shown to demonstrate consistent loss of and detection of the unmodified benzyl cation fragment (theoretical: 91.0548 *m/z*). Parent BAC structures and retention times (*t<sub>R</sub>*) are provided.

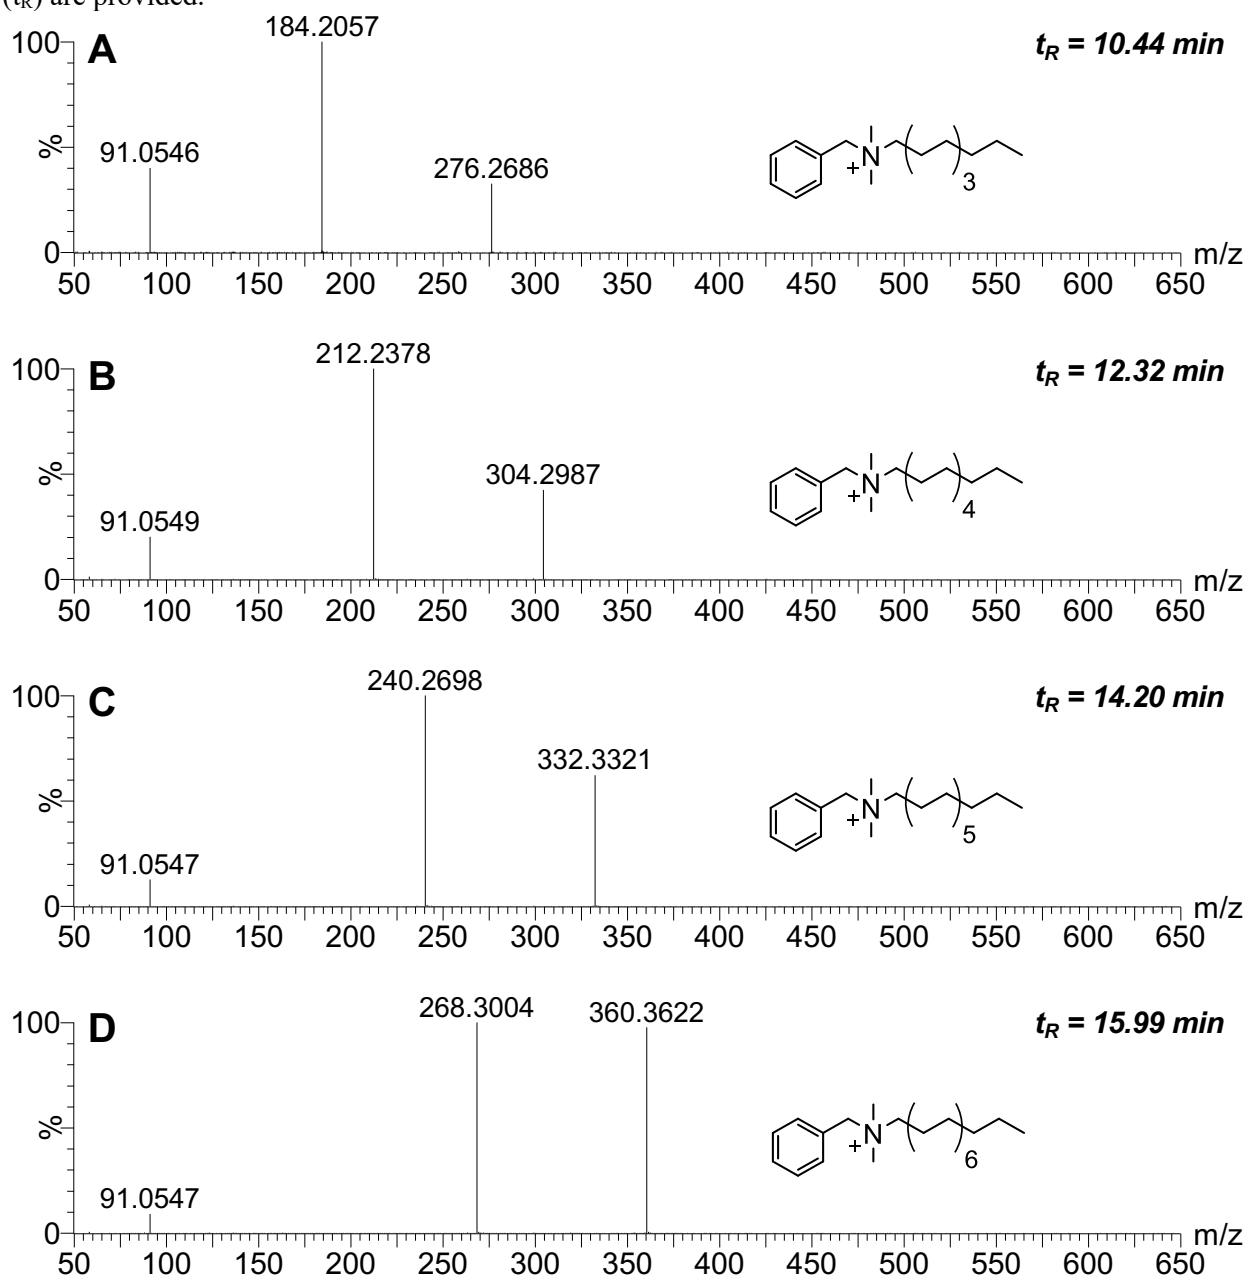

**Figure S2.** Representative MS/MS fragmentation spectra (25 eV collision energy) of the major +1O BAC metabolites (A) C<sub>10</sub>-BAC+1O, (B) C<sub>12</sub>-BAC+1O, (C) C<sub>14</sub>-BAC+1O, and (D) C<sub>16</sub>-BAC+1O produced by NADPH-dependent metabolism in HLM are shown to demonstrate consistent loss of and detection of the unmodified benzyl cation fragment (theoretical: 91.0548 *m/z*). Analyte retention times (*t<sub>R</sub>*) and proposed metabolite structures are provided.

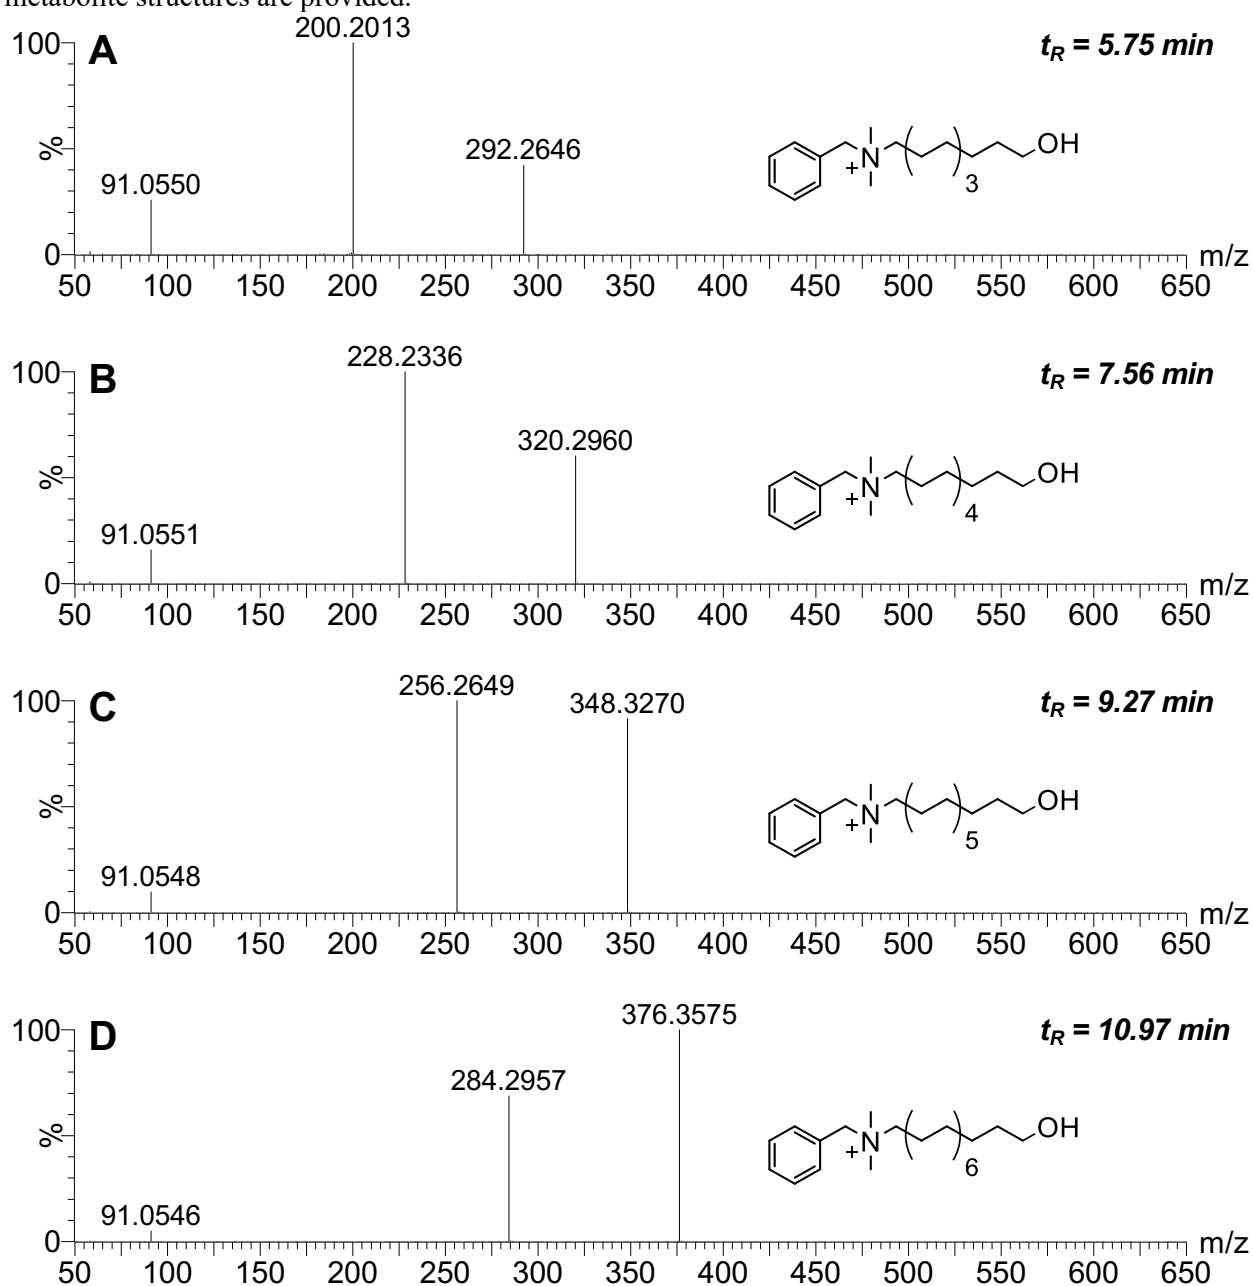

**Figure S3.** Representative MS/MS fragmentation spectra (25 eV collision energy) of the minor +1O BAC metabolites (A) C<sub>10</sub>-BAC+1O, (B) C<sub>12</sub>-BAC+1O, (C) C<sub>14</sub>-BAC+1O, and (D) C<sub>16</sub>-BAC+1O produced by NADPH-dependent metabolism in HLM are shown to demonstrate consistent loss of and detection of the unmodified benzyl cation fragment (theoretical: 91.0548 *m/z*). Analyte retention times (*t<sub>R</sub>*) and proposed metabolite structures are provided.

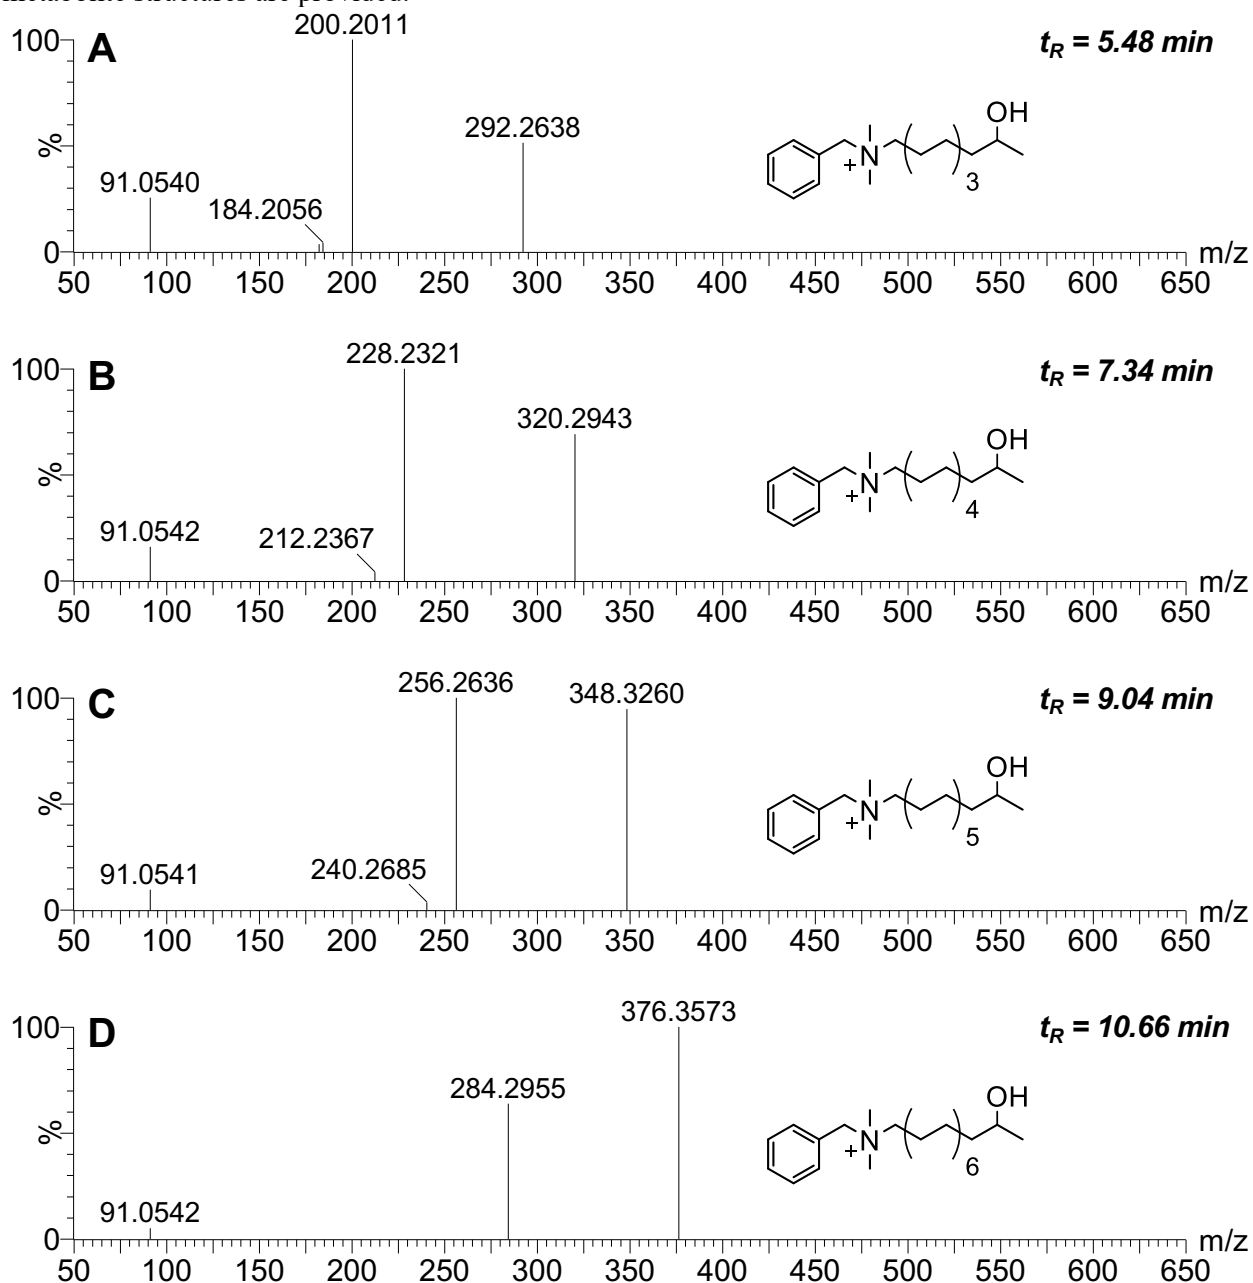

**Figure S4.** Representative MS/MS fragmentation spectra (25 eV collision energy) of the major +2O BAC metabolites (A) C<sub>10</sub>-BAC+2O, (B) C<sub>12</sub>-BAC+2O, (C) C<sub>14</sub>-BAC+2O, and (D) C<sub>16</sub>-BAC+2O produced by NADPH-dependent metabolism in HLM are shown to demonstrate consistent loss of and detection of the unmodified benzyl cation fragment (theoretical: 91.0548 *m/z*). Analyte retention times (*t<sub>R</sub>*) and proposed metabolite structures are provided.

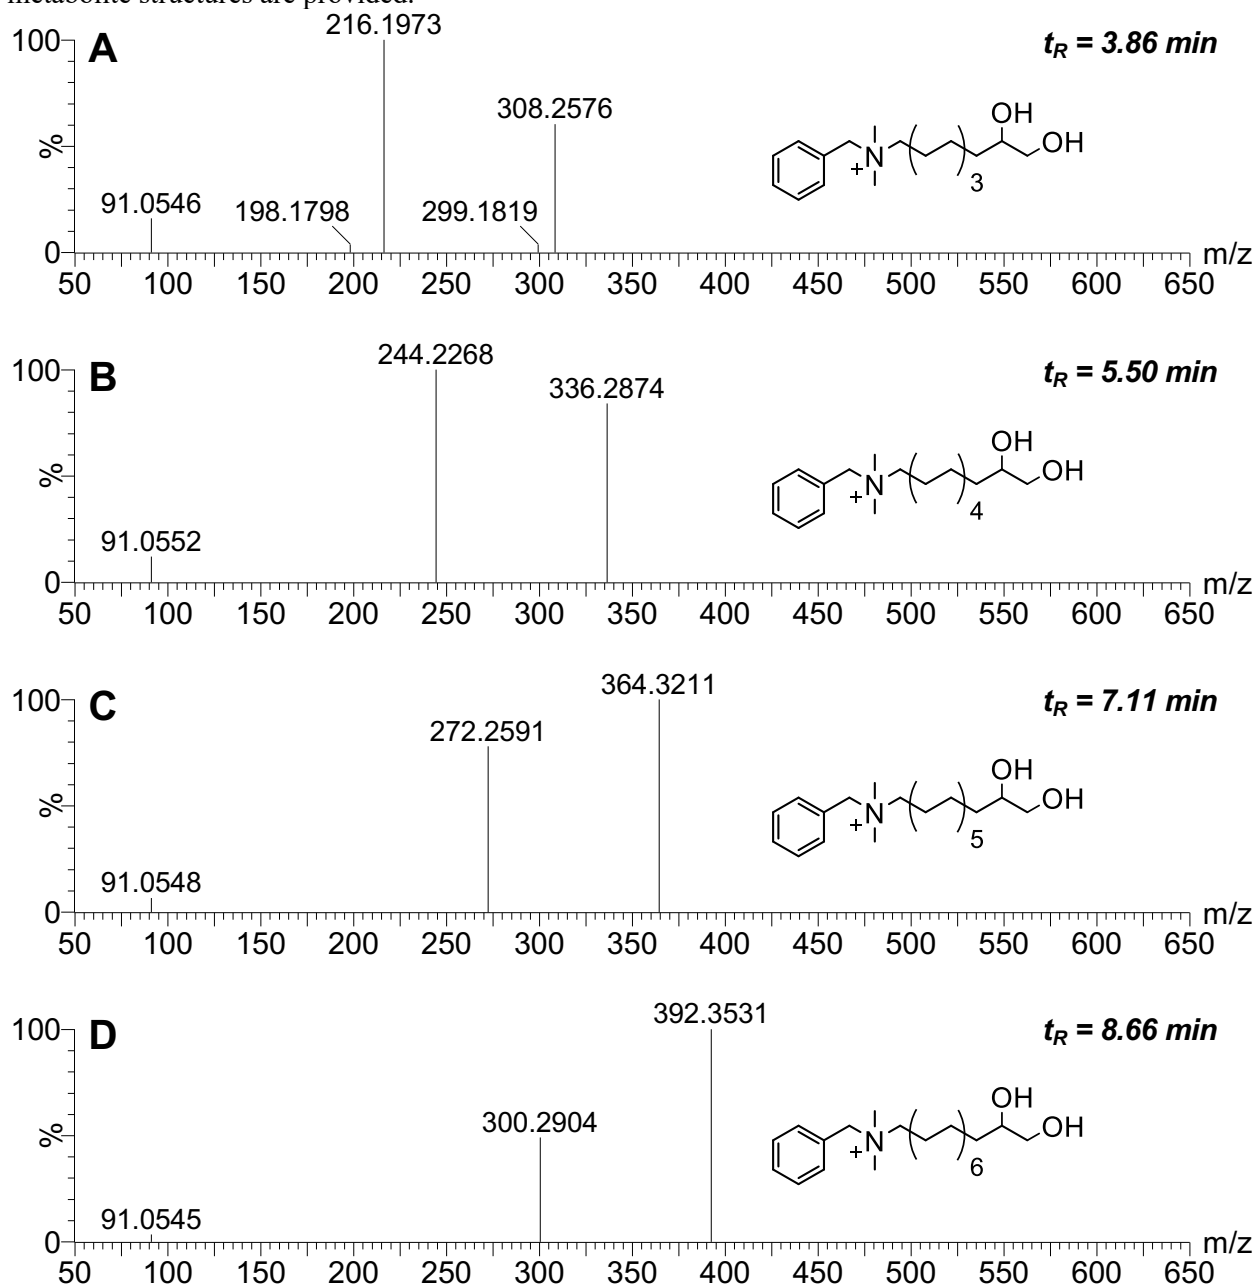

**Figure S5.** Representative MS/MS fragmentation spectra (25 eV collision energy) of the major +1O, -2H BAC metabolites (A) C<sub>10</sub>-BAC+1O-2H, (B) C<sub>12</sub>-BAC+1O-2H, (C) C<sub>14</sub>-BAC+1O-2H, and (D) C<sub>16</sub>-BAC+1O-2H produced by NADPH-dependent metabolism in HLM are shown to demonstrate consistent loss of and detection of the unmodified benzyl cation fragment (theoretical: 91.0548 *m/z*). Analyte retention times (*t<sub>R</sub>*) and proposed metabolite structures are provided.

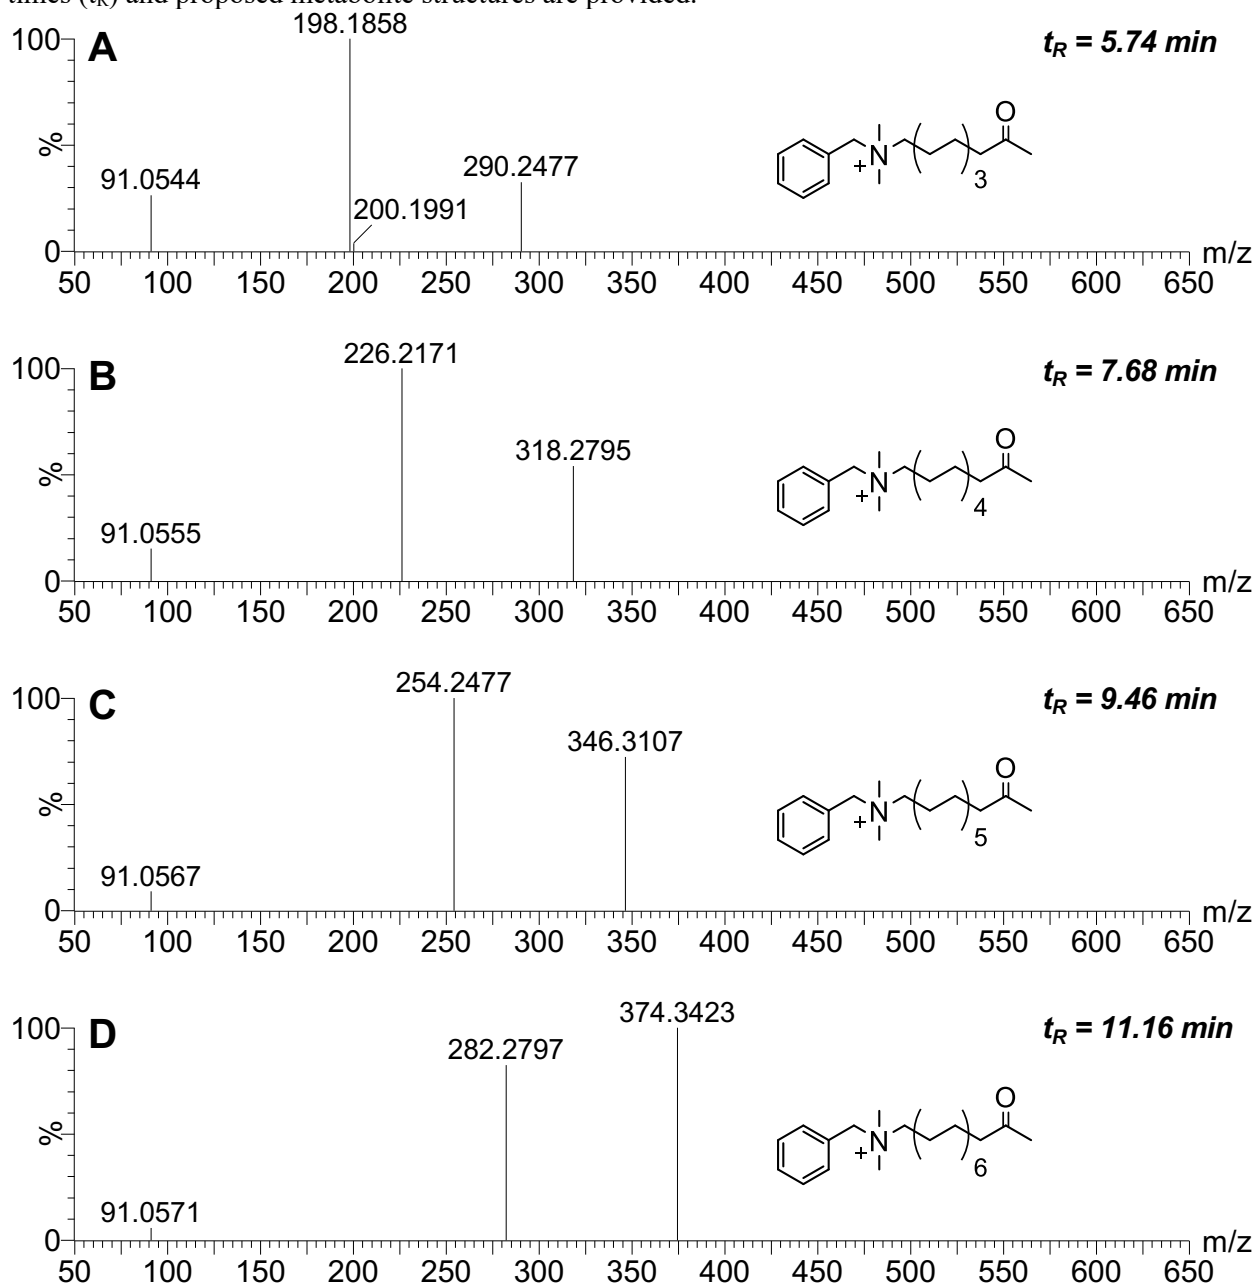

**Figure S6.** Representative MS/MS fragmentation spectra (25 eV collision energy) of the major +2O, -2H BAC metabolites (A) C<sub>10</sub>-BAC+2O-2H, (B) C<sub>12</sub>-BAC+2O-2H, (C) C<sub>14</sub>-BAC+2O-2H, and (D) C<sub>16</sub>-BAC+2O-2H produced by NADPH-dependent metabolism in HLM are shown to demonstrate consistent loss of and detection of the unmodified benzyl cation fragment (theoretical: 91.0548 *m/z*). Analyte retention times (*t<sub>R</sub>*) and proposed metabolite structures are provided.

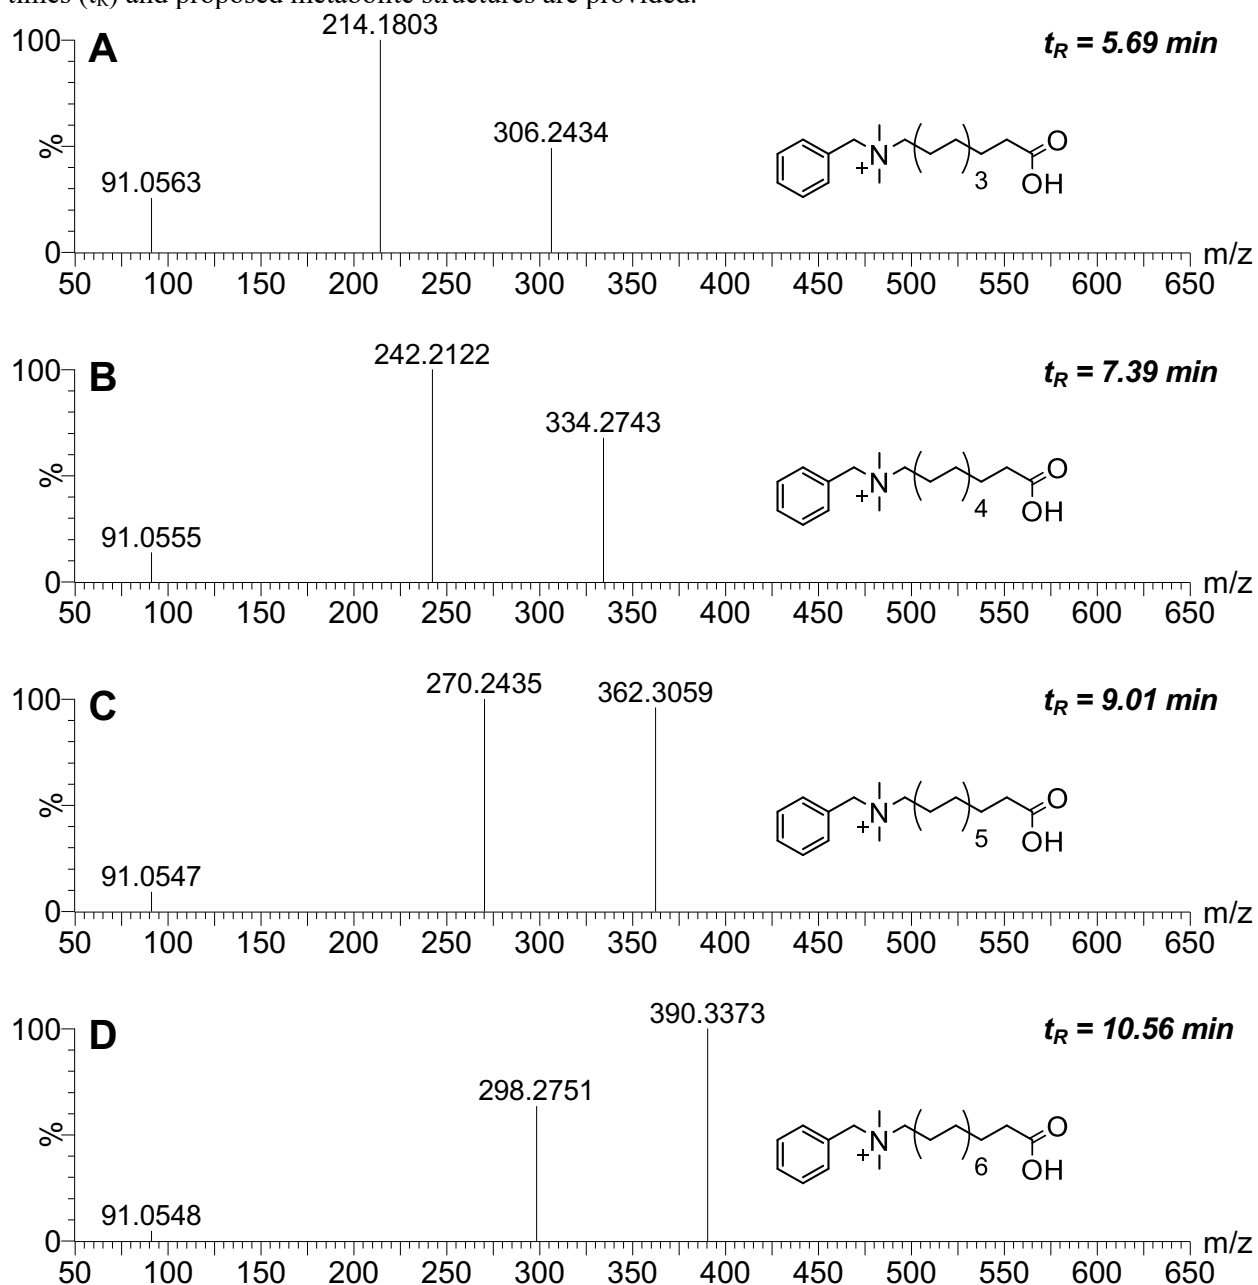



**Figure S7.** Representative MS/MS fragmentation spectra (25 eV collision energy) of authentic C<sub>10</sub>-BAC metabolite standards synthesized in-house (A) (ω-1)-hydroxy C<sub>10</sub>-BAC, (B) ω-hydroxy C<sub>10</sub>-BAC, (C) (ω, ω-1)-dihydroxy C<sub>10</sub>-BAC, (D) (ω-1)-ketone C<sub>10</sub>-BAC, and (E) ω-carboxylic acid C<sub>10</sub>-BAC are shown to demonstrate consistent loss of and detection of the unmodified benzyl cation fragment (theoretical: 91.0548 m/z). Analyte retention times (*t<sub>R</sub>*) and the chemical structures (confirmed by <sup>1</sup>H-NMR) are provided.

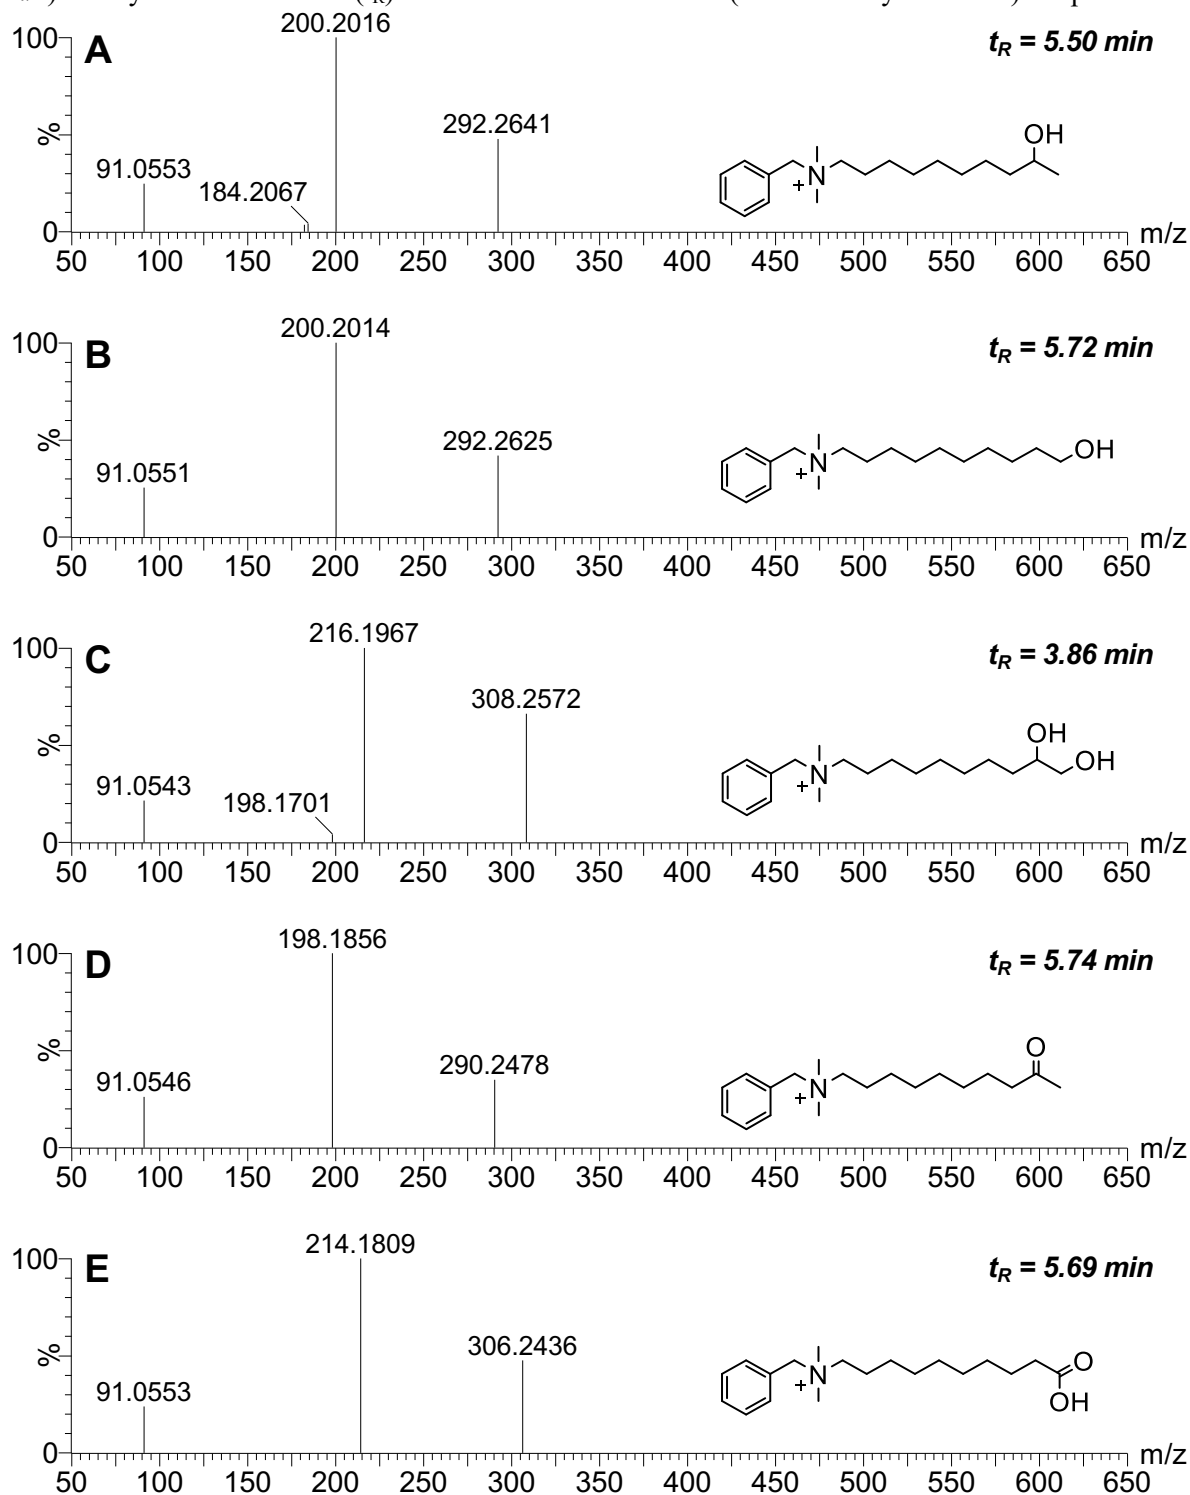

**Figure S8.** LC-MS chromatograms of authentic C<sub>10</sub>-BAC metabolite standards synthesized in-house (A) (ω-1)-hydroxy C<sub>10</sub>-BAC, (B) ω-hydroxy C<sub>10</sub>-BAC, (C) (ω, ω-1)-dihydroxy C<sub>10</sub>-BAC, (D) (ω-1)-ketone C<sub>10</sub>-BAC, and (E) ω-carboxylic acid C<sub>10</sub>-BAC are shown. Analyte peaks are labeled with retention times. The mass (*m/z*) filtered ( $\pm 0.005$  *m/z*) and maximum peak height are also provided. In Panels A and D, respectively, (ω-2)-hydroxy C<sub>10</sub>-BAC and (ω-2)-ketone C<sub>10</sub>-BAC are noted as minor impurities.

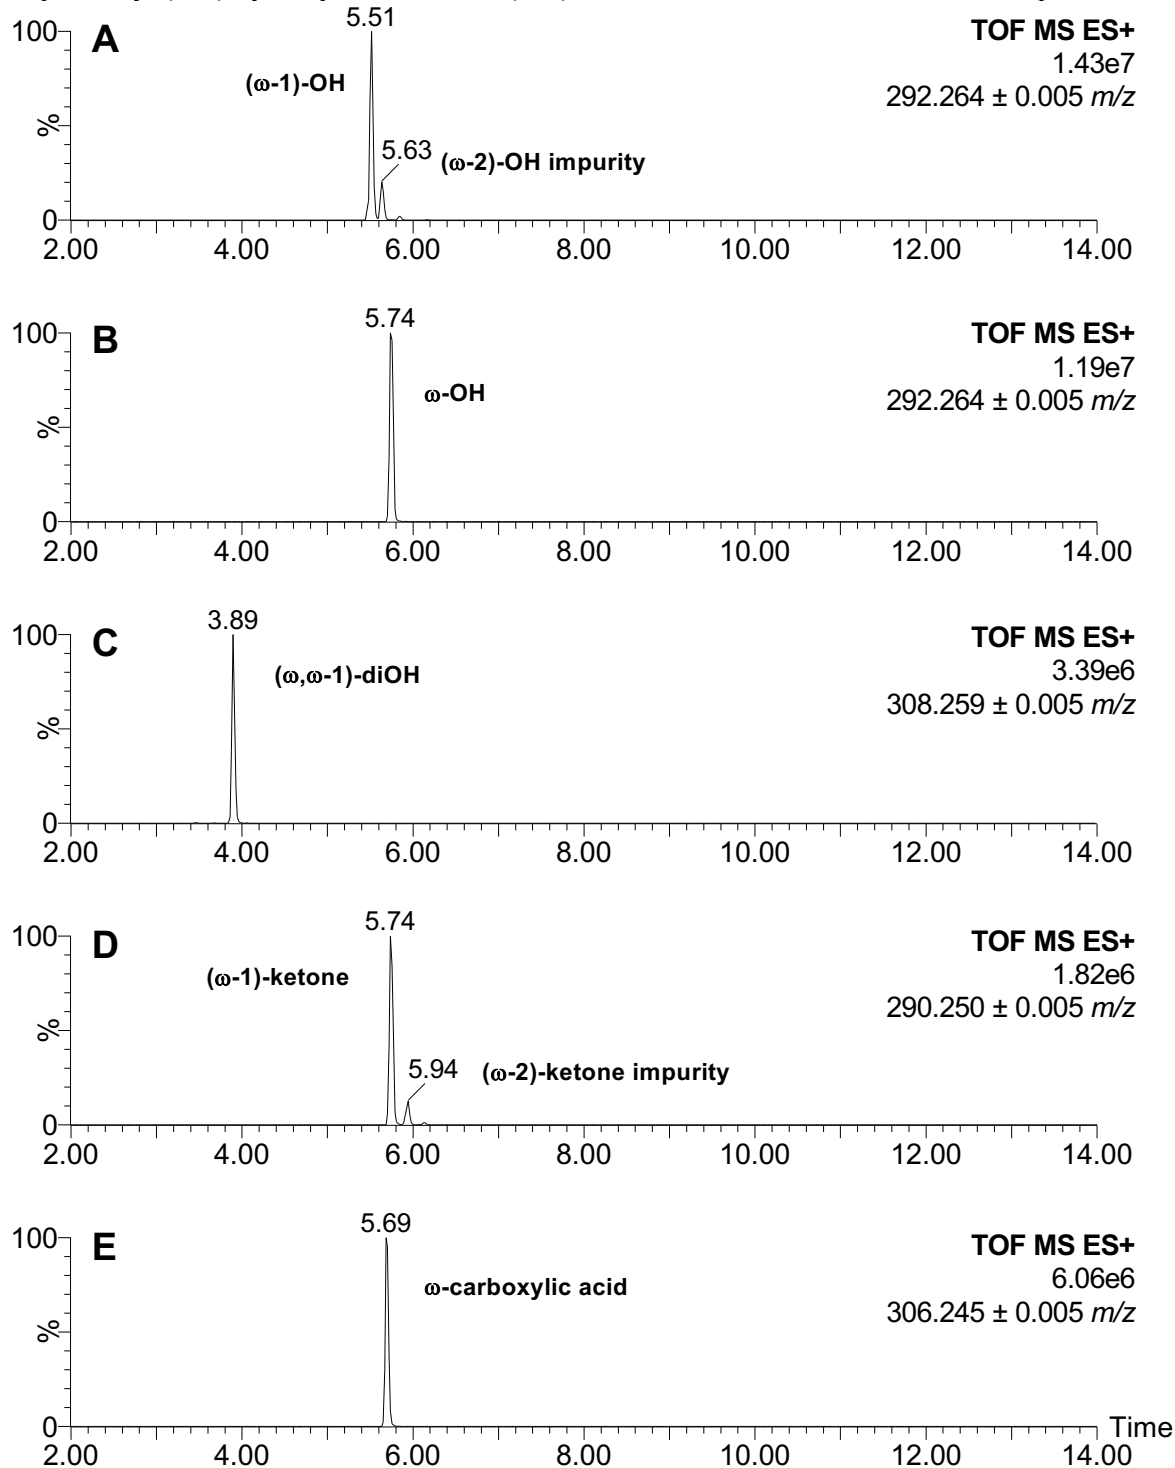

**Figure S9.** LC-MS chromatograms displaying +10 BAC metabolites of the substrates (A) C<sub>10</sub>-BAC, (B) C<sub>12</sub>-BAC, (C) C<sub>14</sub>-BAC, and (D) C<sub>16</sub>-BAC produced by NADPH-dependent metabolism in HLM are shown. Analyte peaks are labeled with retention times. The mass (*m/z*) filtered ( $\pm 0.005$  *m/z*) and maximum peak height are also provided.

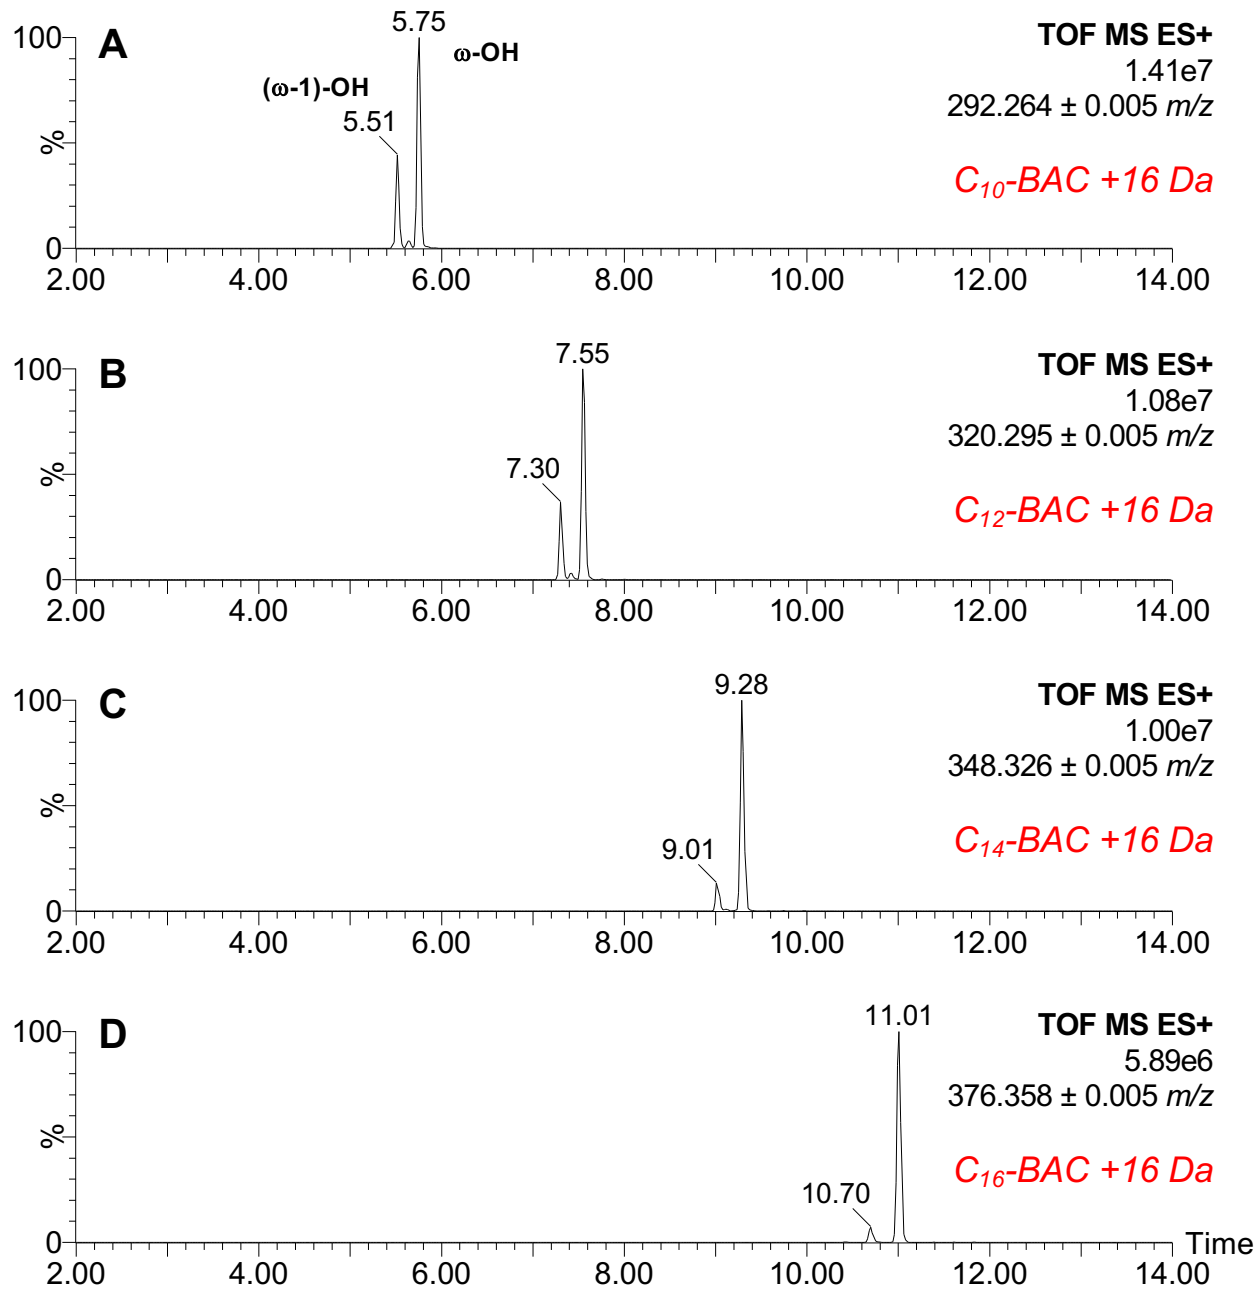

**Figure S10.** LC-MS chromatograms displaying +20 BAC metabolites of the substrates (A) C<sub>10</sub>-BAC, (B) C<sub>12</sub>-BAC, (C) C<sub>14</sub>-BAC, and (D) C<sub>16</sub>-BAC produced by NADPH-dependent metabolism in HLM are shown. Analyte peaks are labeled with retention times. The mass (*m/z*) filtered ( $\pm 0.005$  *m/z*) and maximum peak height are also provided.

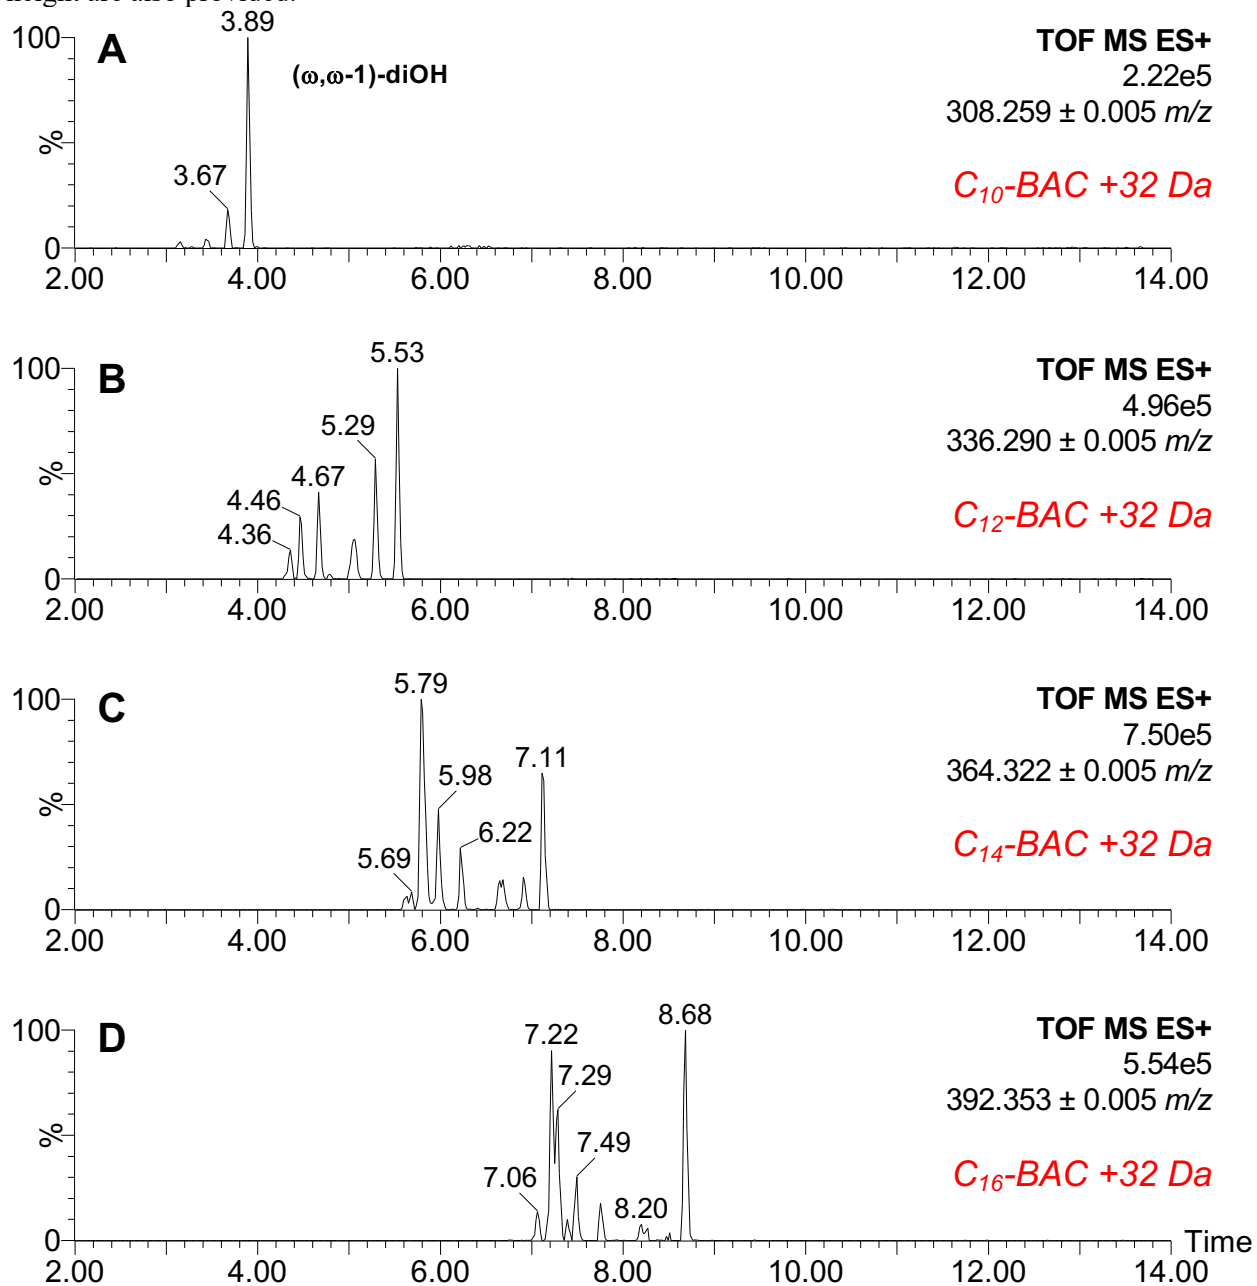

**Figure S11.** LC-MS chromatograms displaying +1O, -2H BAC metabolites of the substrates (A) C<sub>10</sub>-BAC, (B) C<sub>12</sub>-BAC, (C) C<sub>14</sub>-BAC, and (D) C<sub>16</sub>-BAC produced by NADPH-dependent metabolism in HLM are shown. Analyte peaks are labeled with retention times. The mass (*m/z*) filtered ( $\pm 0.005$  *m/z*) and maximum peak height are also provided.

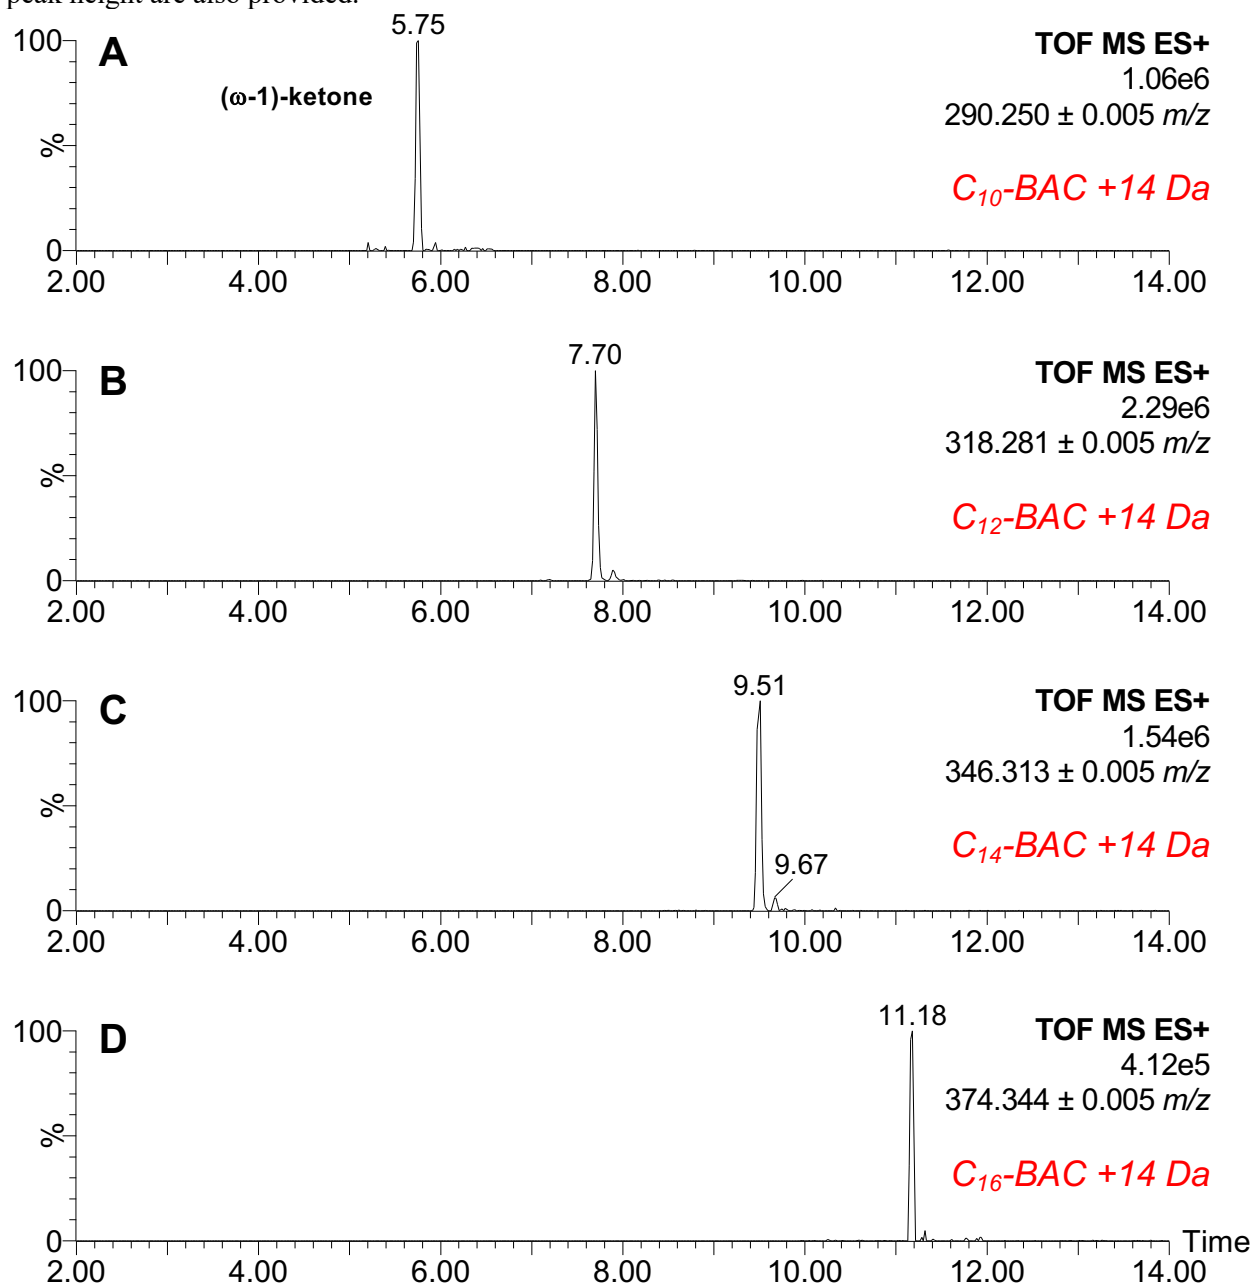

**Figure S12.** LC-MS chromatograms displaying +2O, -2H BAC metabolites of the substrates (A) C<sub>10</sub>-BAC, (B) C<sub>12</sub>-BAC, (C) C<sub>14</sub>-BAC, and (D) C<sub>16</sub>-BAC produced by NADPH-dependent metabolism in HLM are shown. Analyte peaks are labeled with retention times. The mass (*m/z*) filtered ( $\pm 0.005$  *m/z*) and maximum peak height are also provided.

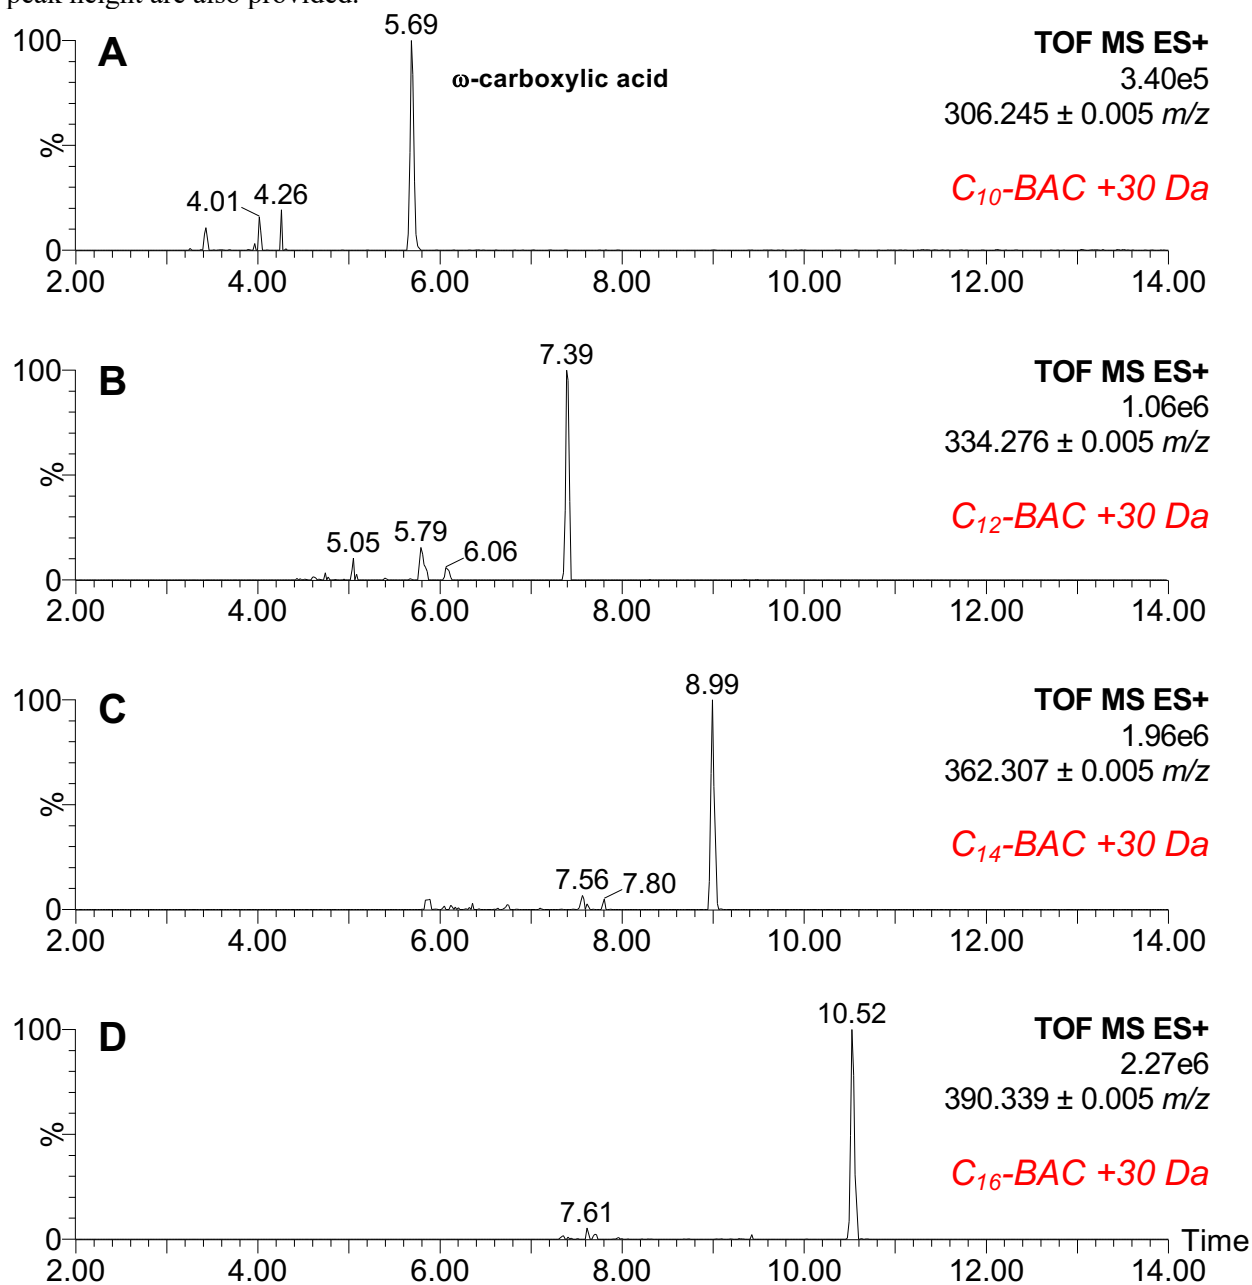

**Figure S13.** LC-MS chromatograms displaying (A) +1O (B) +2O (C) +1O, -2H, and (D) +2O, -2H metabolites of C<sub>10</sub>-BAC produced by NADPH-dependent metabolism in recombinant CYP2D6 are shown. Analyte peaks are labeled with retention times. The mass (*m/z*) filtered ( $\pm 0.005$  *m/z*) and maximum peak height are also provided.

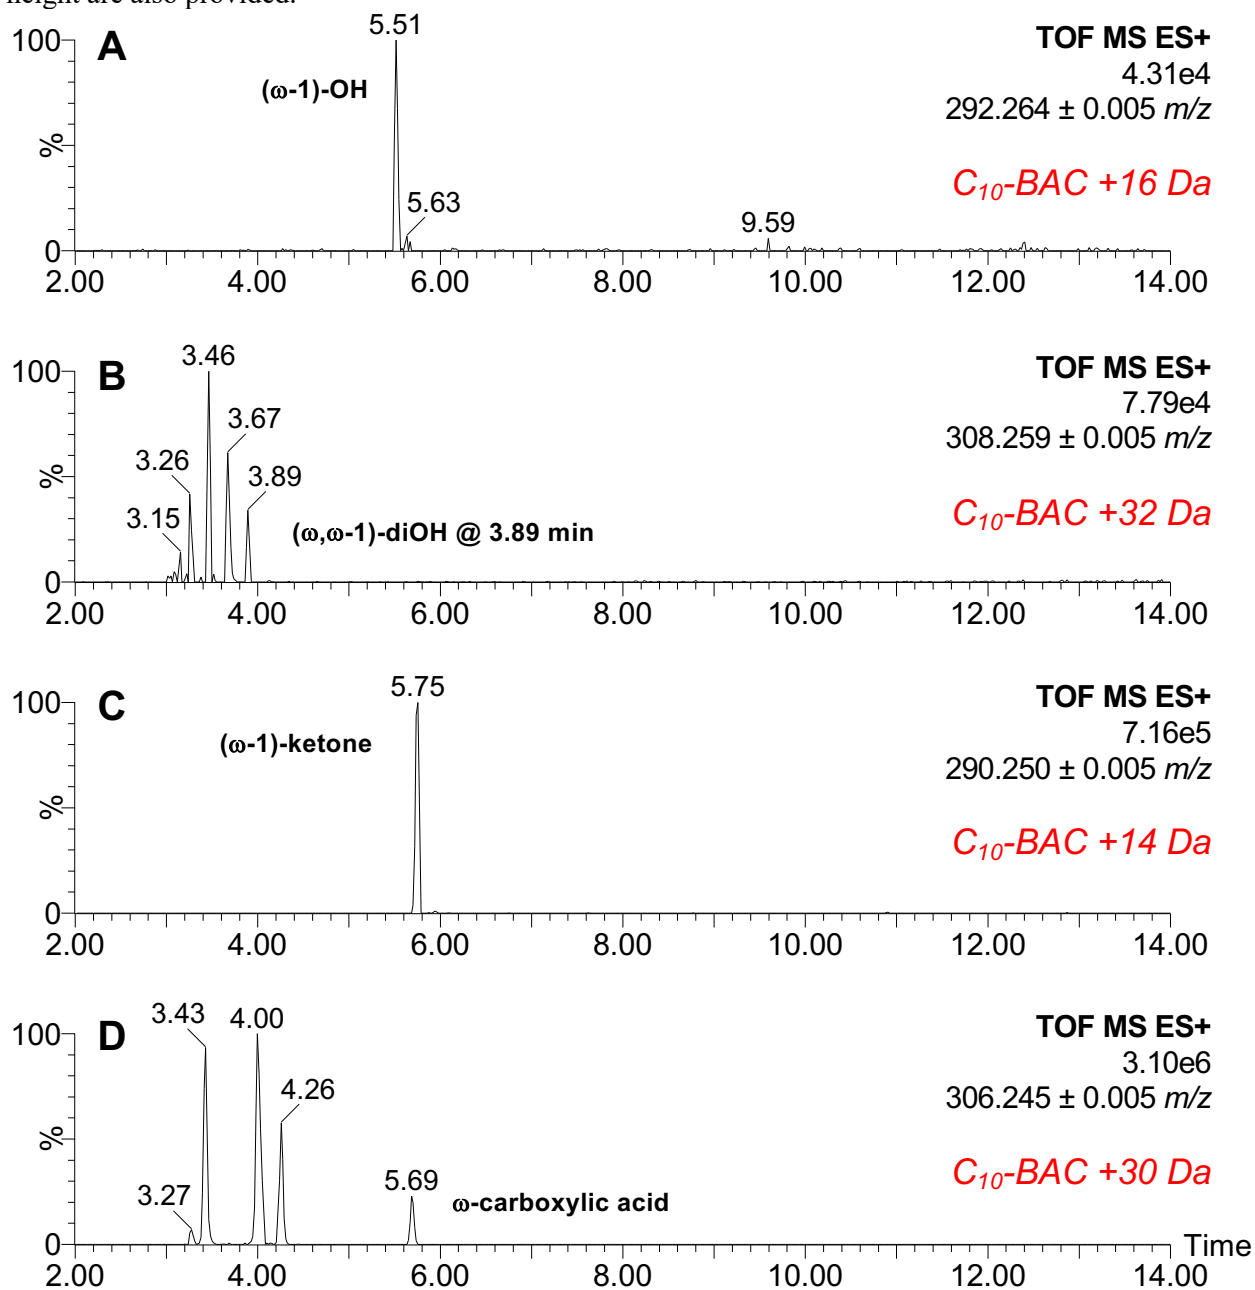

**Figure S14.** LC-MS chromatograms displaying (A) +1O (B) +2O (C) +1O, -2H, and (D) +2O, -2H metabolites of C<sub>10</sub>-BAC produced by NADPH-dependent metabolism in recombinant CYP4F12 are shown. Analyte peaks are labeled with retention times. The mass (*m/z*) filtered ( $\pm 0.005$  *m/z*) and maximum peak height are also provided.

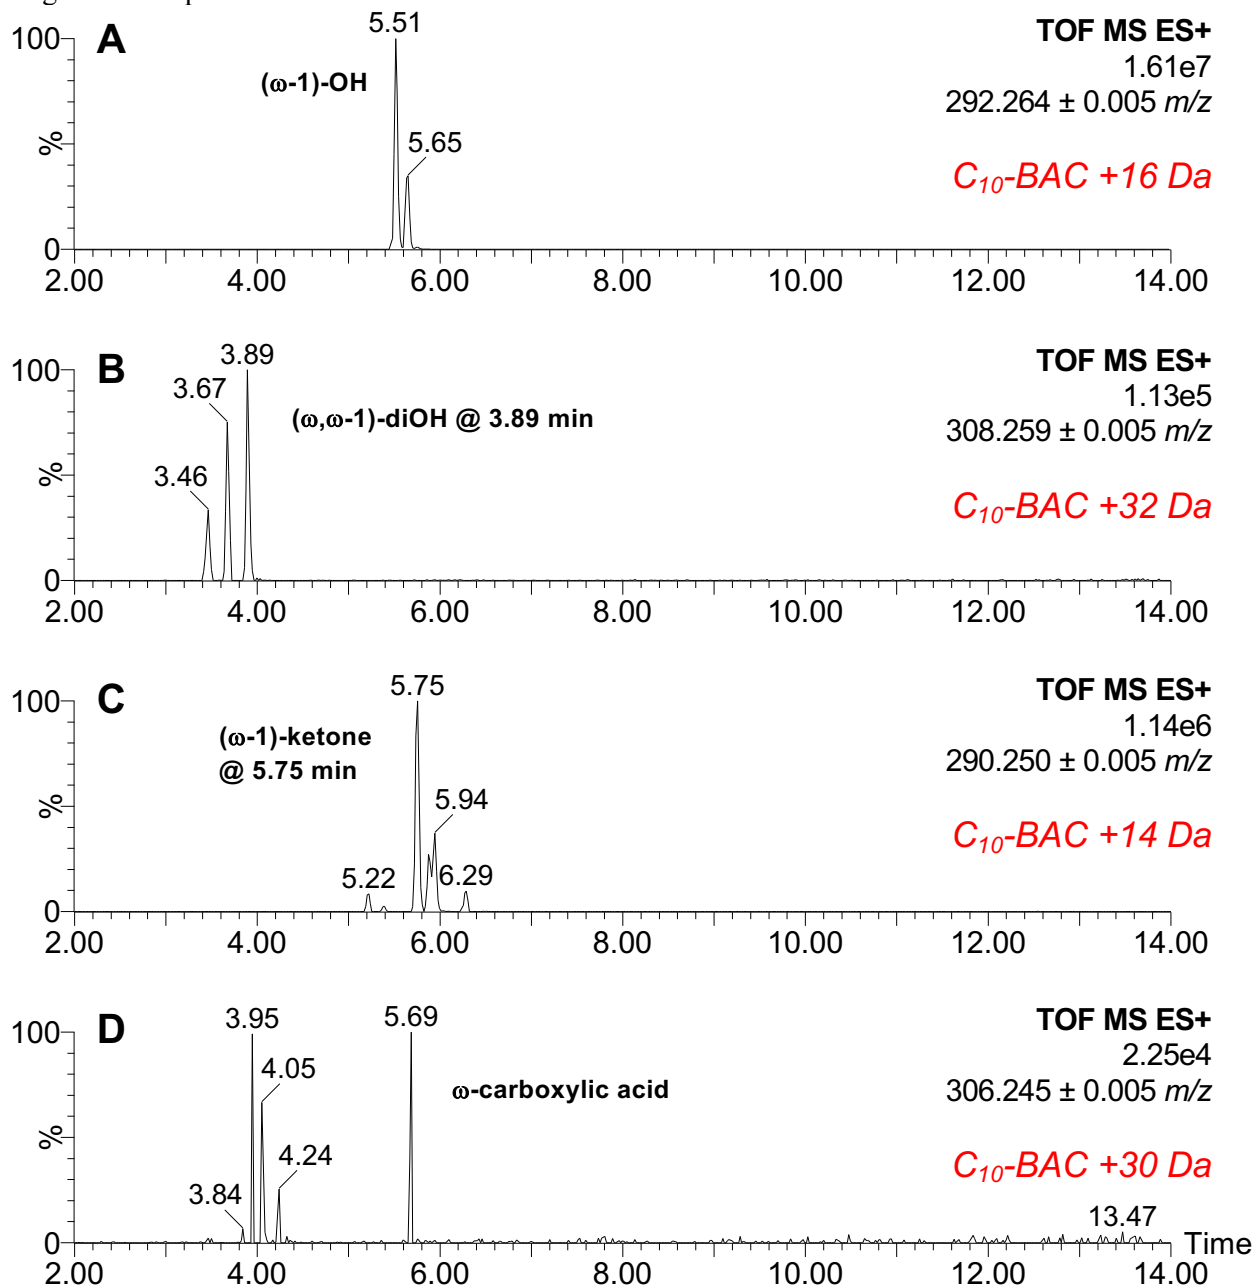



**Figure S15.** LC-MS chromatograms displaying (A) +1O (B) +2O (C) +1O, -2H, and (D) +2O, -2H metabolites of C<sub>16</sub>-BAC produced by NADPH-dependent metabolism in recombinant CYP2D6 are shown. Analyte peaks are labeled with retention times. The mass (*m/z*) filtered ( $\pm 0.005$  *m/z*) and maximum peak height are also provided.

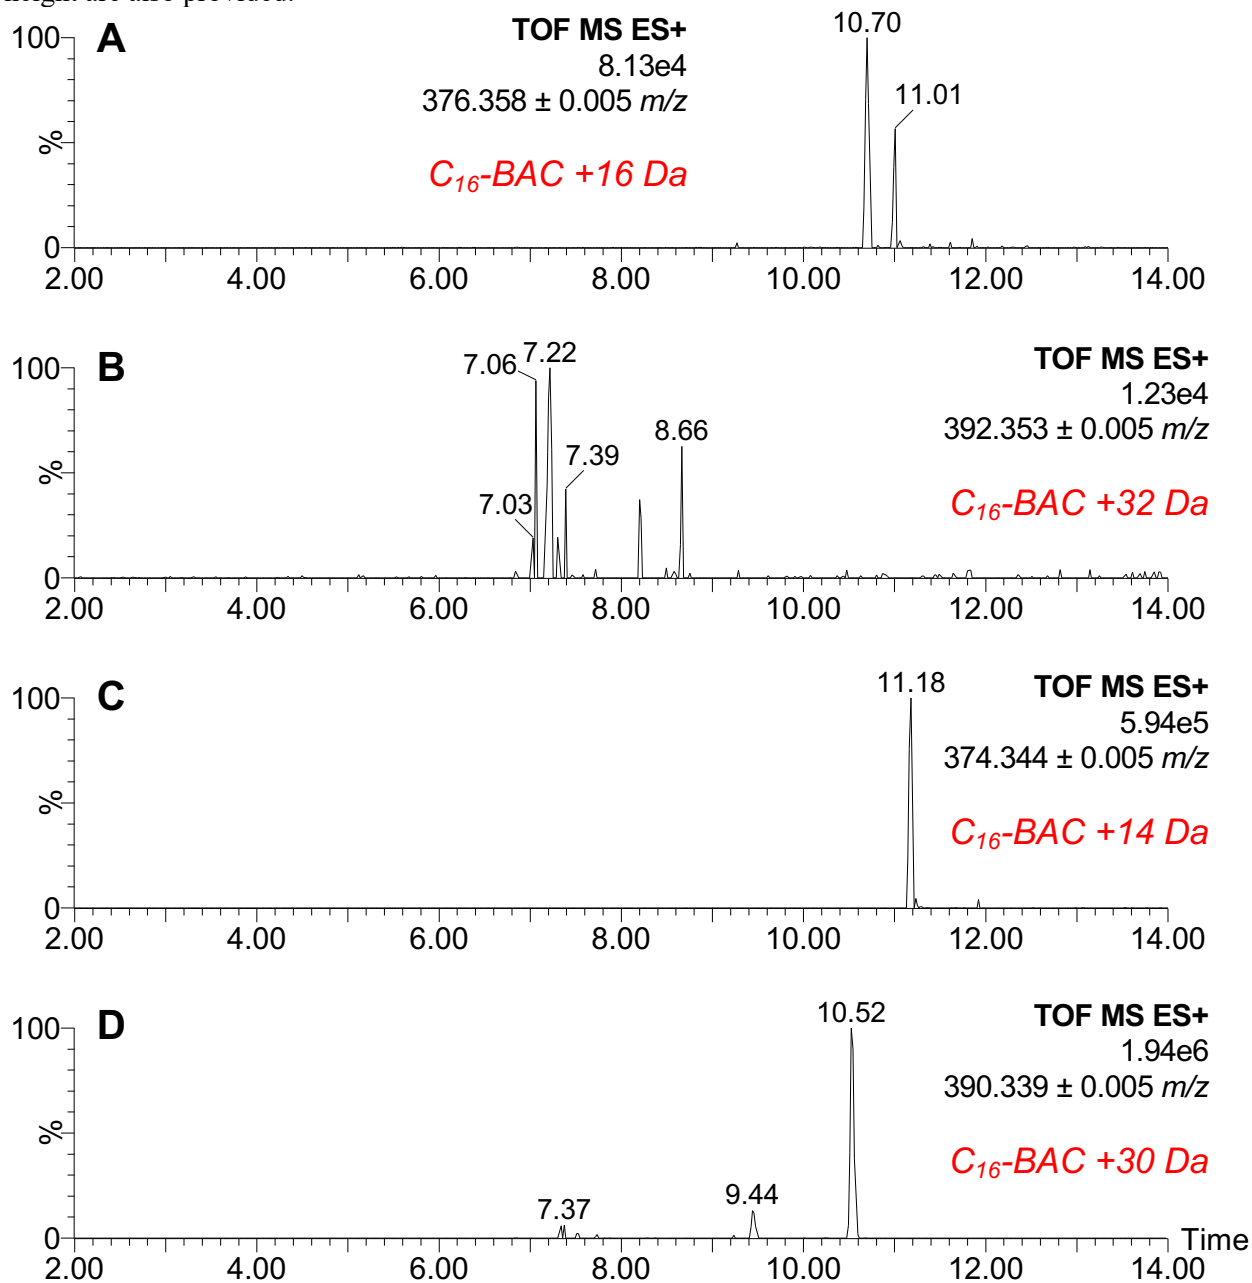

**Figure S16.** LC-MS chromatograms displaying (A) +1O (B) +2O (C) +1O, -2H, and (D) +2O, -2H metabolites of C<sub>16</sub>-BAC produced by NADPH-dependent metabolism in recombinant CYP4F12 are shown. Analyte peaks are labeled with retention times. The mass (*m/z*) filtered ( $\pm 0.005$  *m/z*) and maximum peak height are also provided.

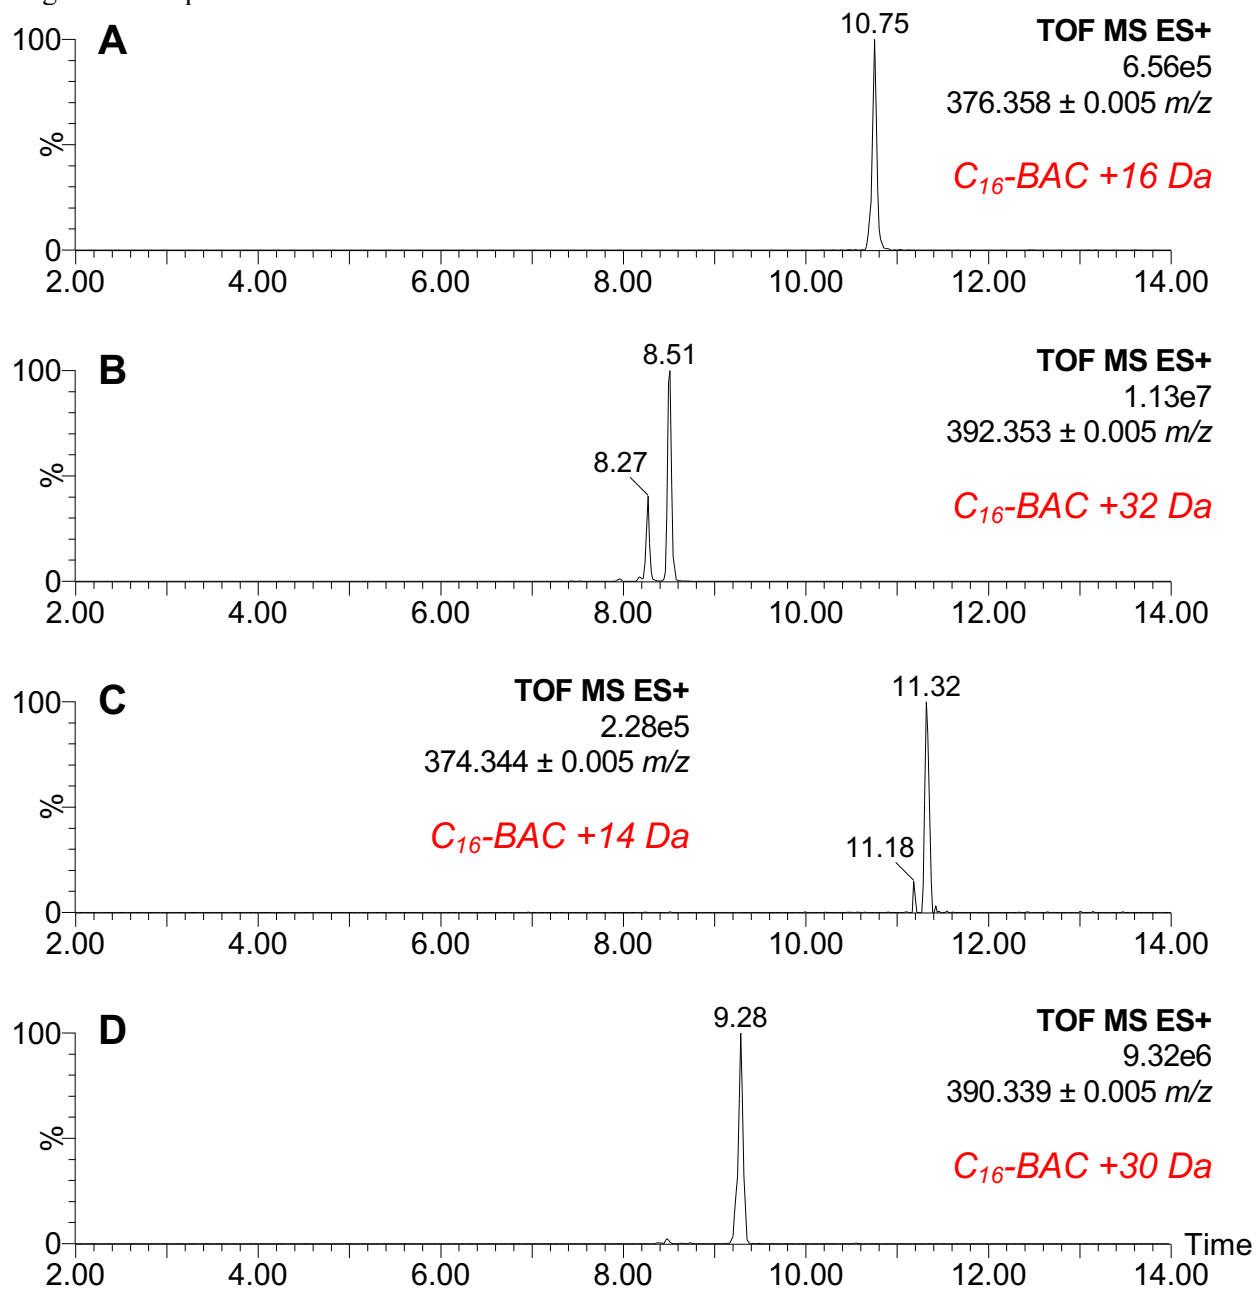

**Figure S17.** LC-MS chromatograms displaying (A) +1O (B) +2O (C) +1O, -2H, and (D) +2O, -2H metabolites of C<sub>16</sub>-BAC produced by NADPH-dependent metabolism in recombinant CYP4F2 are shown. Analyte peaks are labeled with retention times. The mass (*m/z*) filtered ( $\pm 0.005$  *m/z*) and maximum peak height are also provided.

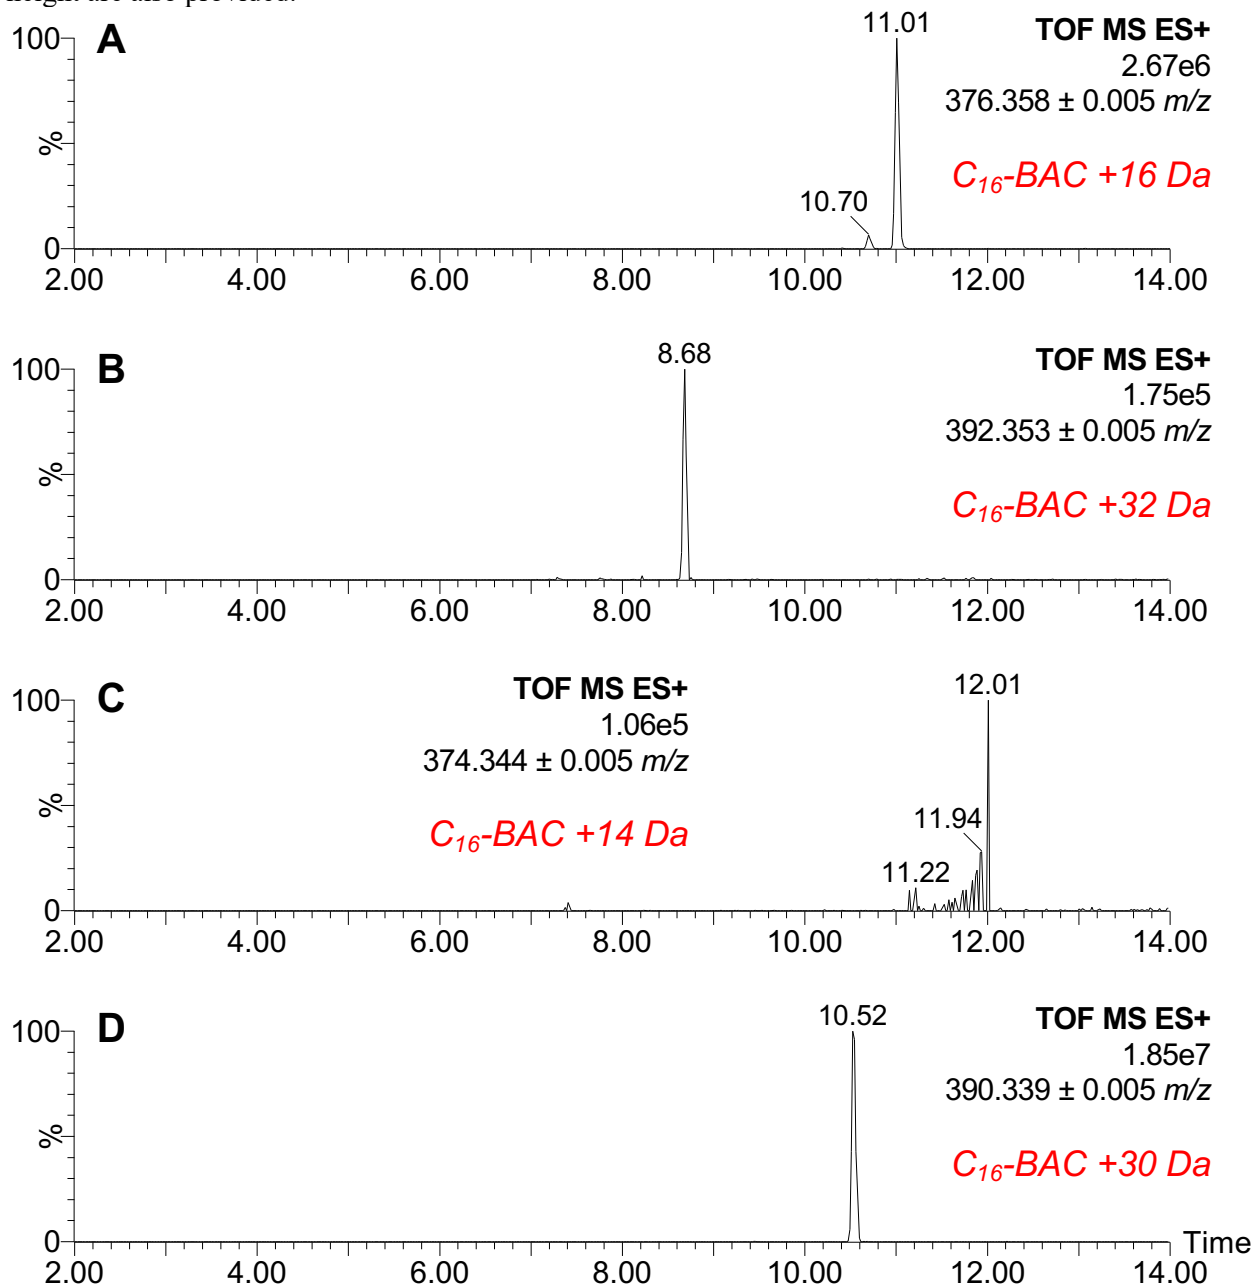

**Figure S18.**  $^1\text{H-NMR}$  spectrum of  $\omega$ -hydroxy- $\text{C}_{10}$ -BAC in  $\text{CDCl}_3$ .

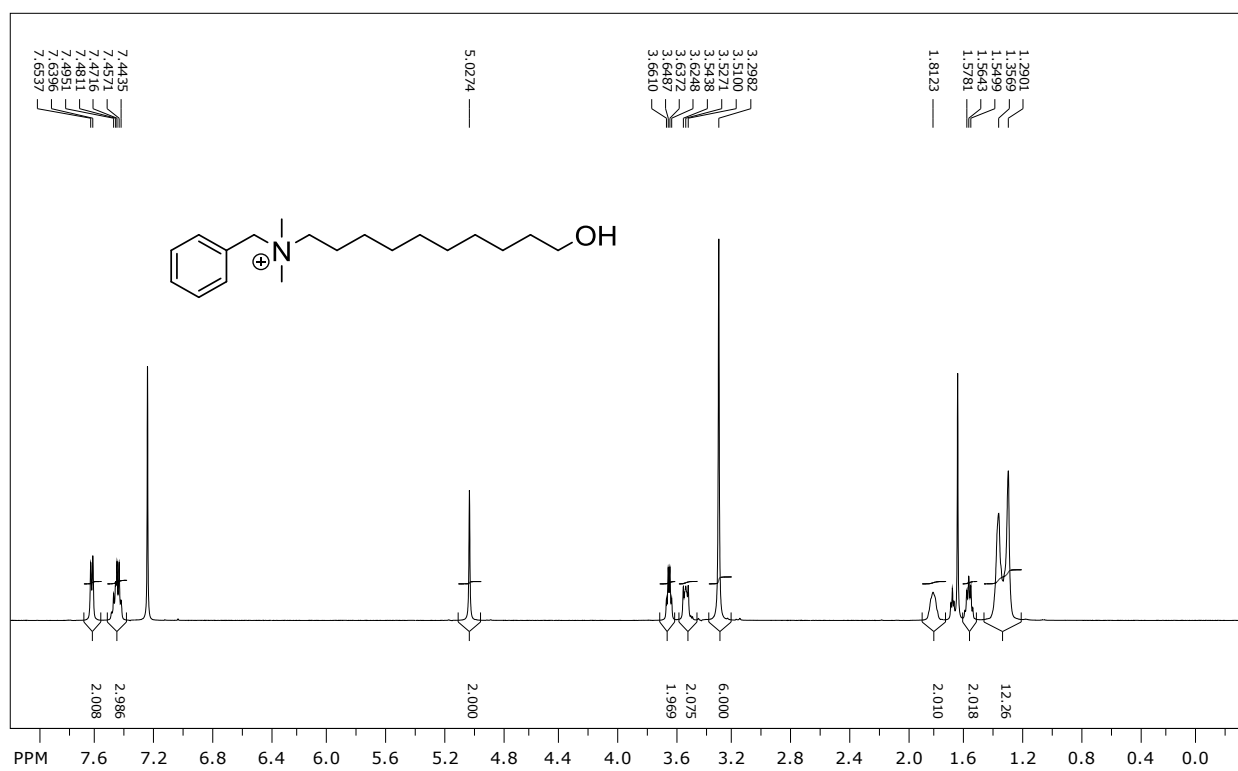

Figure S19. <sup>1</sup>H-NMR spectrum of ω-alkene-C<sub>10</sub>-BAC in CDCl<sub>3</sub>.

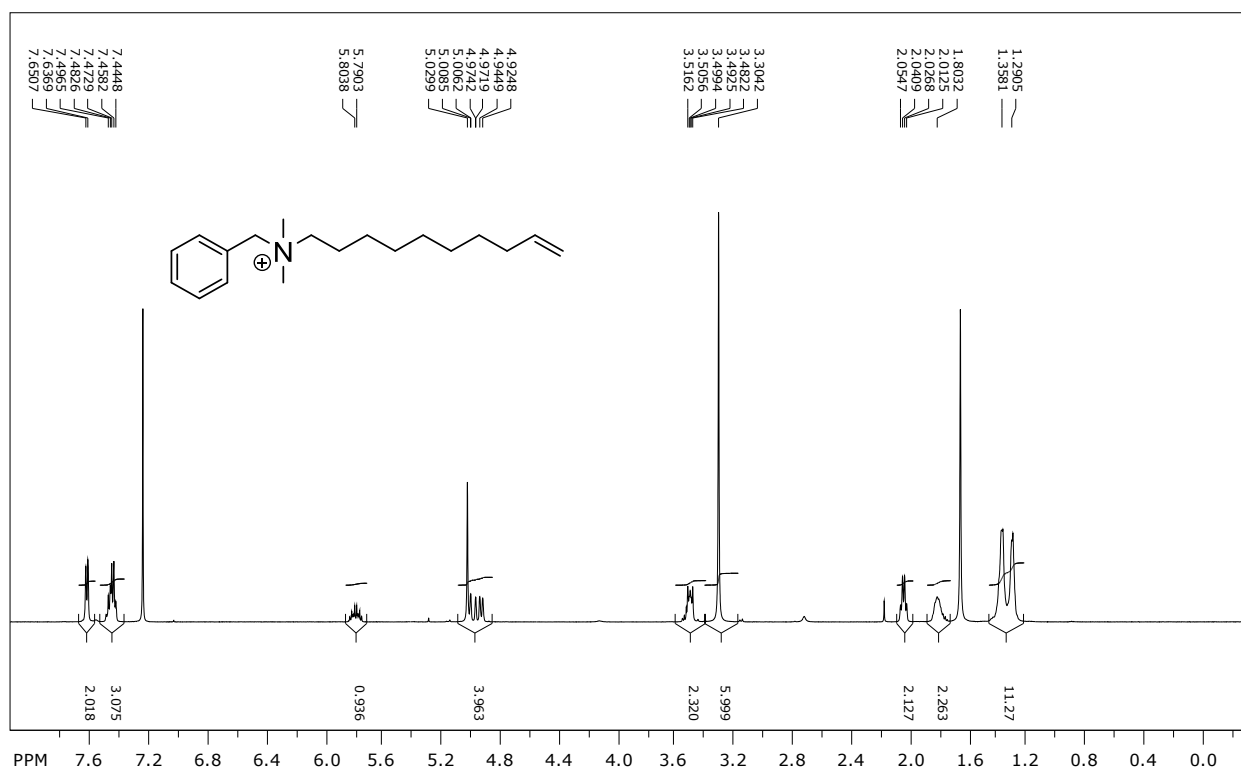

**Figure S20.**  $^1\text{H-NMR}$  spectrum of ( $\omega$ -1)-hydroxy- $\text{C}_{10}$ -BAC in  $\text{CDCl}_3$ . The small triplet at 0.94 ppm is due to the presence of ( $\omega$ -2)-hydroxy- $\text{C}_{10}$ -BAC as a minor impurity.

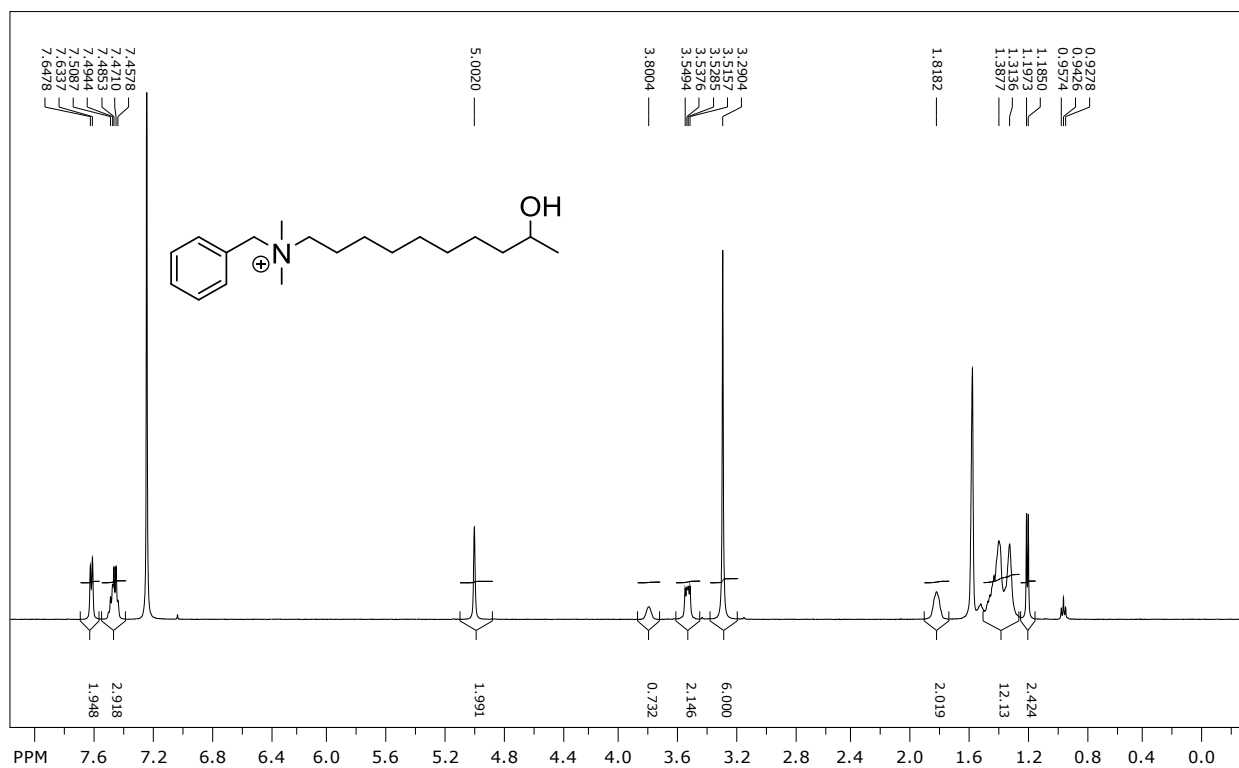

Figure S21. <sup>1</sup>H-NMR spectrum of (ω, ω-1)-dihydroxy-C<sub>10</sub>-BAC in CDCl<sub>3</sub>.

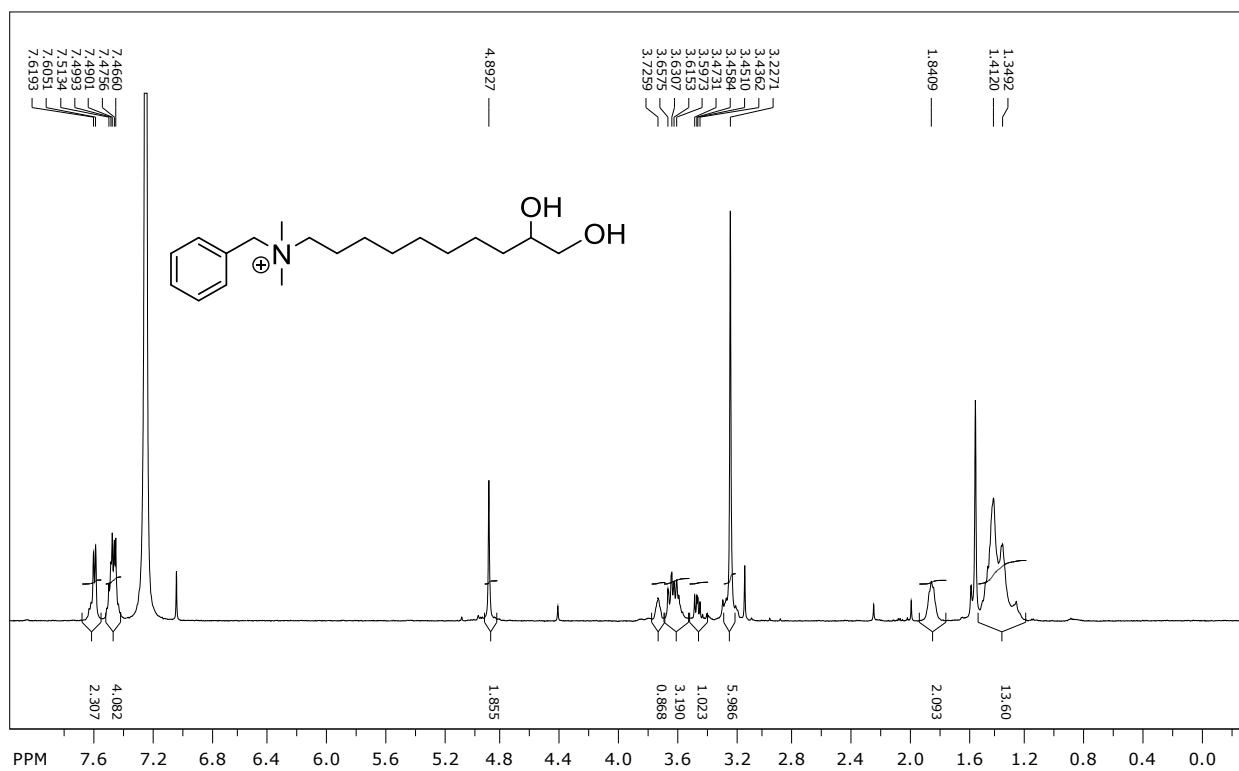

**Figure S22.**  $^1\text{H-NMR}$  spectrum of ( $\omega$ -1)-ketone- $\text{C}_{10}$ -BAC in  $\text{CDCl}_3$ . The triplet at 1.04 ppm is due to the presence of ( $\omega$ -2)-ketone- $\text{C}_{10}$ -BAC as a minor impurity.

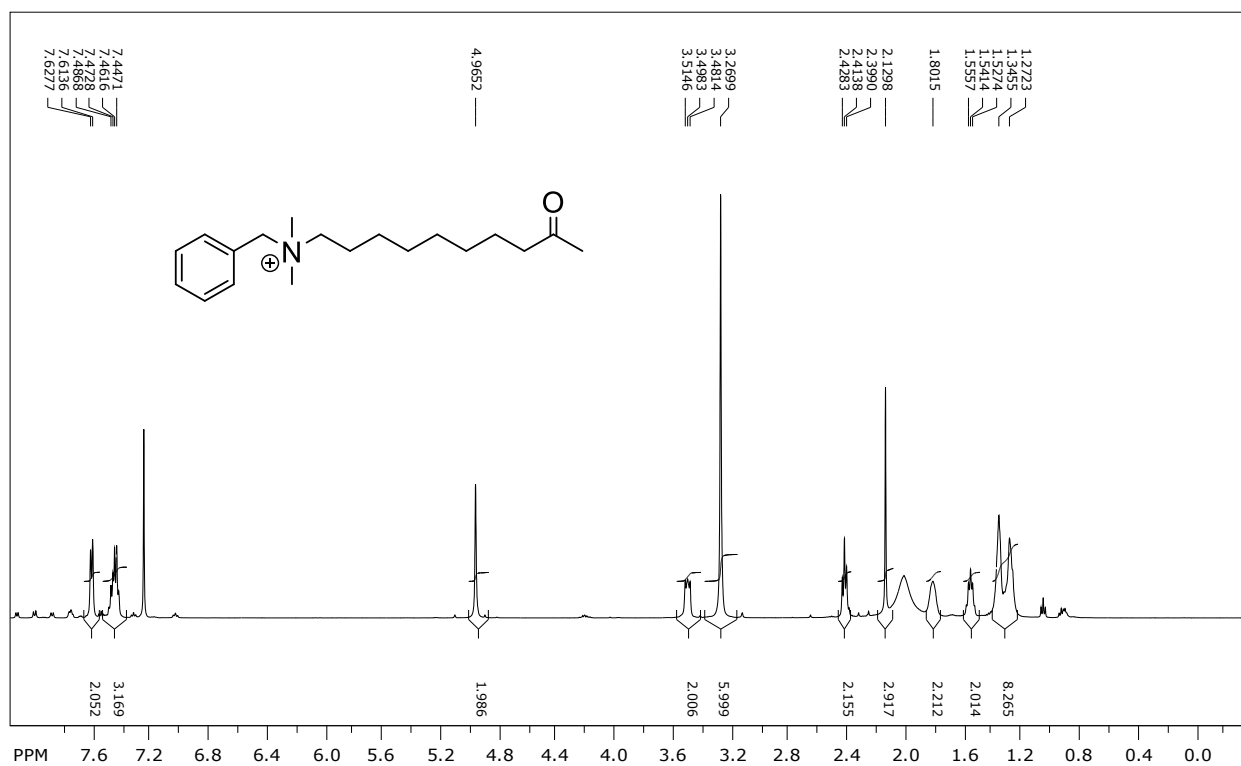



Figure S23. <sup>1</sup>H-NMR spectrum of ω-carboxylic acid-C<sub>10</sub>-BAC in CDCl<sub>3</sub>.

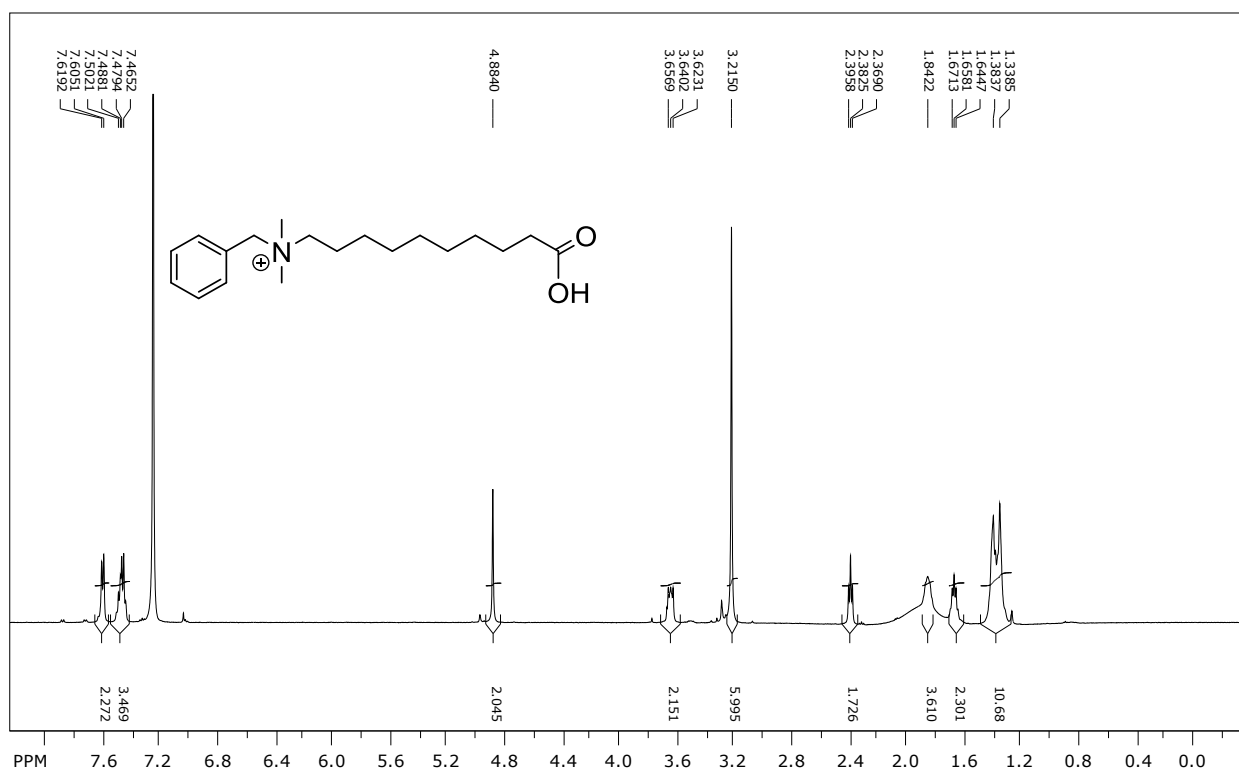

**Figure S24.**  $^1\text{H-NMR}$  spectrum of  $\omega$ -carboxylic acid- $\text{C}_{10}$ -BAC in  $\text{d}_6$ -DMSO.

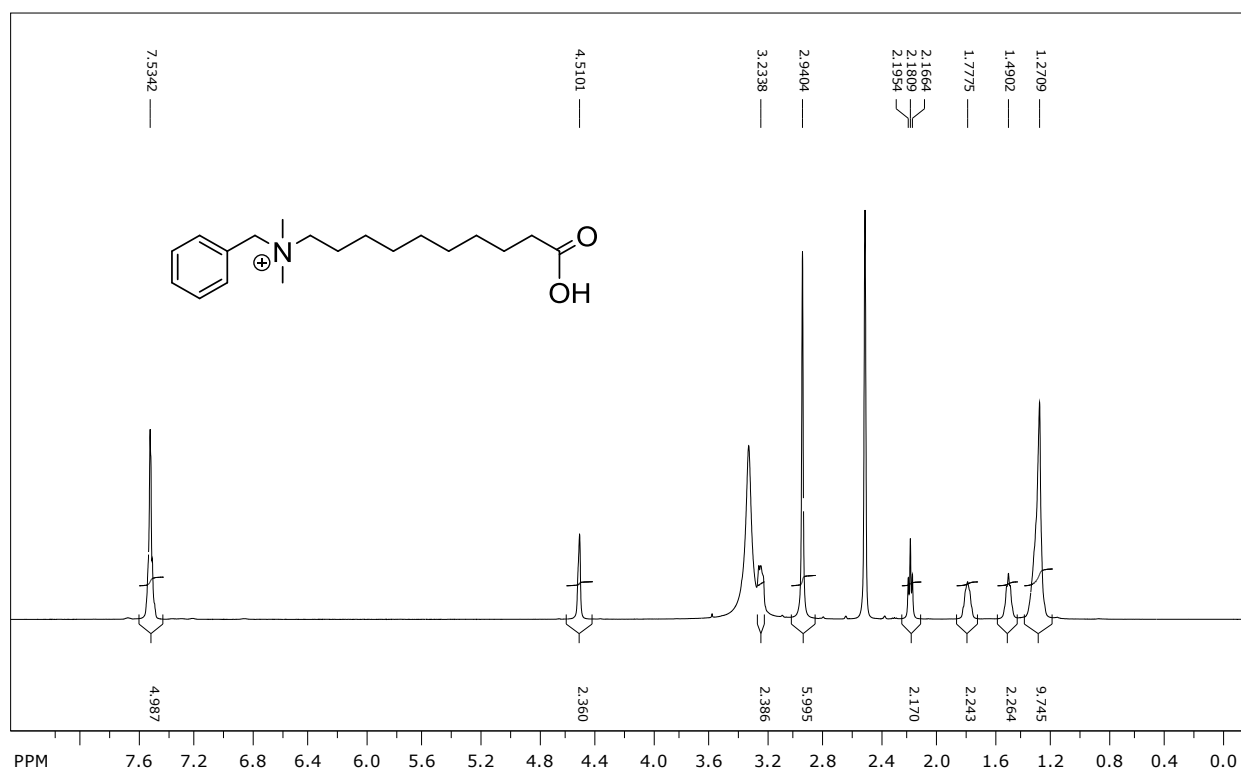

Supplement: NIHMS1590991-supplement-supplemental_material.pdf [file NIHMS1590991-supplement-supplemental_material.pdf]
